# Supplementary material for: Protocol for the combined cardiometabolic deep phenotyping and registry-based 20-year follow-up study of the Inter99 cohort
Source: PubMed Central journal article supplement — BMJ Open. 2024 Jan 29;14(1):e078501. doi: 10.1136/bmjopen-2023-078501 (PMC10826573; doi:10.1136/bmjopen-2023-078501), 2024-01-29
Supplement: bmjopen-2023-078501.draft_revisions.pdf [file bmjopen-2023-078501.draft_revisions.pdf]

# BMJ Open

BMJ Open is committed to open peer review. As part of this commitment we make the peer review history of every article we publish publicly available.

When an article is published we post the peer reviewers' comments and the authors' responses online. We also post the versions of the paper that were used during peer review. These are the versions that the peer review comments apply to.

The versions of the paper that follow are the versions that were submitted during the peer review process. They are not the versions of record or the final published versions. They should not be cited or distributed as the published version of this manuscript.

BMJ Open is an open access journal and the full, final, typeset and author-corrected version of record of the manuscript is available on our site with no access controls, subscription charges or pay-per-view fees (<http://bmjopen.bmj.com>).

If you have any questions on BMJ Open's open peer review process please email [info.bmjopen@bmj.com](mailto:info.bmjopen@bmj.com)

# BMJ Open

## Protocol for the combined cardiometabolic deep phenotyping and registry-based twenty-year follow-up study of the Inter99 cohort.

|                               |                                                                                                                                                                                                                                                                                                                                                                                                                                                                                                                                                                                                                                                                                                                                                                                                                                                                                                                                                                                                                                                                                                                                                                                                                                                                                                                                                                                                                                                                                                                                                                                                                                                                                                                                                                                                                                                                                                                                                                                                                                                                                                                                                                                   |
|-------------------------------|-----------------------------------------------------------------------------------------------------------------------------------------------------------------------------------------------------------------------------------------------------------------------------------------------------------------------------------------------------------------------------------------------------------------------------------------------------------------------------------------------------------------------------------------------------------------------------------------------------------------------------------------------------------------------------------------------------------------------------------------------------------------------------------------------------------------------------------------------------------------------------------------------------------------------------------------------------------------------------------------------------------------------------------------------------------------------------------------------------------------------------------------------------------------------------------------------------------------------------------------------------------------------------------------------------------------------------------------------------------------------------------------------------------------------------------------------------------------------------------------------------------------------------------------------------------------------------------------------------------------------------------------------------------------------------------------------------------------------------------------------------------------------------------------------------------------------------------------------------------------------------------------------------------------------------------------------------------------------------------------------------------------------------------------------------------------------------------------------------------------------------------------------------------------------------------|
| Journal:                      | <i>BMJ Open</i>                                                                                                                                                                                                                                                                                                                                                                                                                                                                                                                                                                                                                                                                                                                                                                                                                                                                                                                                                                                                                                                                                                                                                                                                                                                                                                                                                                                                                                                                                                                                                                                                                                                                                                                                                                                                                                                                                                                                                                                                                                                                                                                                                                   |
| Manuscript ID                 | bmjopen-2023-078501                                                                                                                                                                                                                                                                                                                                                                                                                                                                                                                                                                                                                                                                                                                                                                                                                                                                                                                                                                                                                                                                                                                                                                                                                                                                                                                                                                                                                                                                                                                                                                                                                                                                                                                                                                                                                                                                                                                                                                                                                                                                                                                                                               |
| Article Type:                 | Protocol                                                                                                                                                                                                                                                                                                                                                                                                                                                                                                                                                                                                                                                                                                                                                                                                                                                                                                                                                                                                                                                                                                                                                                                                                                                                                                                                                                                                                                                                                                                                                                                                                                                                                                                                                                                                                                                                                                                                                                                                                                                                                                                                                                          |
| Date Submitted by the Author: | 04-Aug-2023                                                                                                                                                                                                                                                                                                                                                                                                                                                                                                                                                                                                                                                                                                                                                                                                                                                                                                                                                                                                                                                                                                                                                                                                                                                                                                                                                                                                                                                                                                                                                                                                                                                                                                                                                                                                                                                                                                                                                                                                                                                                                                                                                                       |
| Complete List of Authors:     | <p>Bjørnsbo, Kirsten; Frederiksberg Hospital Center for Klinisk Forskning og Forebyggelse<br/> Brøns, Charlotte; Steno Diabetes Center Copenhagen,<br/> Aadahl, Mette; Frederiksberg Hospital Center for Klinisk Forskning og Forebyggelse<br/> Kampmann, Freja; Frederiksberg Hospital Center for Klinisk Forskning og Forebyggelse<br/> Friis Bryde Nielsen , Camilla; Frederiksberg Hospital Center for Klinisk Forskning og Forebyggelse<br/> Lundbergh, Bjørn; Frederiksberg Hospital Center for Klinisk Forskning og Forebyggelse<br/> Christensen, Rasmus; Steno Diabetes Center Copenhagen<br/> Kårhus, Line Lund; Frederiksberg Hospital Center for Klinisk Forskning og Forebyggelse, Section of Epidemiology<br/> Madsen, Anja; Frederiksberg Hospital Center for Klinisk Forskning og Forebyggelse<br/> Hansen, CS; Steno Diabetes Center Copenhagen<br/> Nørgaard, Kirsten; Steno Diabetes Center Copenhagen<br/> Jørgensen, Niklas; Rigshospitalet, Clinical biochemistry<br/> Suetta, Charlotte; University of Copenhagen, Copenhagen University Hospital, Bispebjerg and Frederiksberg<br/> Kjaer, Michael; University of Copenhagen, Department of Clinical Medicine,<br/> Grarup, Niels ; University of Copenhagen Faculty of Health and Medical Sciences, Novo Nordisk Foundation Center for Basic Metabolic Research<br/> Kanters, Jørgen; University of Copenhagen Novo Nordisk Foundation Center for Basic Metabolic Research<br/> Larsen, Michael; University of Copenhagen,<br/> Køber, Lars; Rigshospitalet, Department of Cardiology<br/> Kofoed, KF; University of Copenhagen, Cardiology, section 2014<br/> Loos, Ruth; University of Copenhagen Novo Nordisk Foundation Center for Basic Metabolic Research, Copenhagen University Hospital, Bispebjerg and Frederiksberg<br/> Hansen, Torben; University of Copenhagen Novo Nordisk Foundation Center for Basic Metabolic Research, Center for Basic Metabolic Research, Section of Metabolic Genetics<br/> linneberg, allan; Frederiksberg Hospital Center for Klinisk Forskning og Forebyggelse, Research Centre for Prevention and Health<br/> Vaag, Allan; Steno Diabetes Center Copenhagen</p> |

1  
2  
3  
4  
5  
6  
7  
8  
9  
10  
11  
12  
13  
14  
15  
16  
17  
18  
19  
20  
21  
22  
23  
24  
25  
26  
27  
28  
29  
30  
31  
32  
33  
34  
35  
36  
37  
38  
39  
40  
41  
42  
43  
44  
45  
46  
47  
48  
49  
50  
51  
52  
53  
54  
55  
56  
57  
58  
59  
60

|           |                                                                                                 |
|-----------|-------------------------------------------------------------------------------------------------|
| Keywords: | DIABETES & ENDOCRINOLOGY, CARDIOLOGY, GENETICS, NUTRITION & DIETETICS, EPIDEMIOLOGY, REGISTRIES |
|           |                                                                                                 |

SCHOLARONE™  
Manuscripts

1  
2  
3  
4 **Protocol for the combined cardiometabolic deep phenotyping and registry-based twenty-year**  
5 **follow-up study of the Inter99 cohort.**  
6  
7  
8

9 Kirsten Bjørnsbo<sup>1\*</sup>, Charlotte Brøns<sup>2\*</sup>, Mette Aadahl<sup>1</sup>, Freja Bach Kampmann<sup>1</sup>, Camilla Friis Bryde  
10 5 Nielsen<sup>1</sup>, Bjørn Lundbergh<sup>1</sup>, Rasmus Wibaek<sup>2</sup>, Line Kårhus<sup>1</sup>, Anja Lykke Madsen<sup>1</sup>, Christian  
11 Stevns<sup>2</sup>, Kirsten Nørgaard<sup>2,3</sup>, Niklas Rye Jørgensen<sup>4</sup>, Charlotte Suetta<sup>5</sup>, Michael Kjær<sup>5</sup>, Niels Grarup<sup>6</sup>,  
12 Jørgen K. Kanters<sup>4,7</sup>, Michael Larsen<sup>3,8</sup>, Lars Køber<sup>9</sup>, Klaus F. Kofoed<sup>3,9</sup>, Ruth J.F. Loos<sup>6</sup>, Torben  
13 Hansen<sup>6</sup>, Allan Linneberg<sup>1,3\*\*</sup>, Allan Vaag<sup>2,10\*\*</sup>  
14  
15  
16  
17

18  
19 10 \* Contributed equally to this work, \*\* Shared last authorship  
20  
21  
22

23 <sup>1</sup> Center for Clinical Research and Prevention, Copenhagen University Hospital – Bispebjerg and  
24 Frederiksberg, Copenhagen, Denmark

25 <sup>2</sup> Steno Diabetes Center Copenhagen, Herlev, Denmark

26 15 <sup>3</sup> Department of Clinical Medicine, Faculty of Health and Medical Sciences, University of  
27 Copenhagen, Denmark

28 <sup>4</sup> Department of Clinical Biochemistry, Copenhagen University Hospital – Rigshospitalet,  
29 Copenhagen, Denmark

30 <sup>5</sup> Institute of Sports Medicine, Dept of Orthopedic Surgery and Department of Geriatrics and  
31 Palliative Medicine, Copenhagen University Hospital – Bispebjerg and Frederiksberg, Copenhagen,  
32 Denmark  
33 20

34 <sup>6</sup> Novo Nordisk Foundation Center for Basic Metabolic Research, Faculty of Health and Medical  
35 Sciences, University of Copenhagen, Copenhagen, Denmark

36 <sup>7</sup> Center of Physiological Research, University of California San Francisco, San Francisco, CA, USA

37 25 <sup>8</sup> Department of Ophthalmology, Copenhagen University Hospital – Rigshospitalet, Glostrup,  
38 Denmark

39 <sup>9</sup> Department of Cardiology and Radiology, Copenhagen University Hospital – Rigshospitalet,  
40 Copenhagen, Denmark

41 <sup>10</sup> Lund University Diabetes Centre, Malmö, Sweden  
42  
43  
44  
45  
46 30

47  
48 Corresponding authors: Kirsten Bjørnsbo [kirsten.bjoernsbo@regionh.dk](mailto:kirsten.bjoernsbo@regionh.dk) and Charlotte Brøns  
49 [charlotte.broens.01@regionh.dk](mailto:charlotte.broens.01@regionh.dk)  
50  
51

52  
53 Words: 3963

54  
55 35 Tables/Figures:1/2  
56  
57  
58  
59  
60

## Abstract

**Introduction** The population-based Inter99 cohort has contributed extensively to our understanding of effects of a systematic screening and lifestyle intervention, as well as the multifactorial etiology of type 2 diabetes (T2D) and cardiovascular disease (CVD). To understand courses, trajectories, and patterns of early and overt cardiometabolic disease manifestations, we will perform a combined clinical deep phenotyping and registry follow-up study of the now 50-80 years old Inter99 participants

**Methods and analysis** The Inter99 cohort comprise individuals aged 30-60 years, who lived in a representative geographical area of greater Copenhagen, Denmark, in 1999. Age- and sex-stratified random subgroups were invited to participate in either a lifestyle intervention (N=13,016) or paper surveys (N=5,264), while the rest served as a reference population (N=43,021). Of the 13,016 individuals assigned to the lifestyle intervention group, 6,784 (52%) accepted participation in a baseline health examination in 1999, including screening for cardiovascular risk factors and prediabetic conditions. All eligible participants will be invited for a deep phenotyping 20-year follow-up clinical examination including measurements of anthropometry, blood pressure, arterial stiffness, cardiometabolic biomarkers, coronary artery calcification, heart rate variability, heart rhythm, liver stiffness, fundus characteristics, muscle strength and mass, as well as health and lifestyle questionnaires. In a subsample, 10-day monitoring of diet, physical activity and continuous glucose measurements will be performed. Fasting blood, urine, and fecal samples to be stored in a biobank.

**Ethics and dissemination** The study was approved by the Medical Ethics Committee, Capital Region, Denmark (H-20076231) and by the Danish Data Protection Agency through the Capital Region of Denmark's registration system (journal number P-2020-1074). Findings will be disseminated in peer-reviewed journals, at conferences, and via presentations to stakeholders, public and policymakers. Data may become available for international collaborations upon request.

**ClinicalTrials.gov registration number** NCT05166447.

## Strengths and limitations of this study

1. The longitudinal design will enable us to follow the course of both early and overt cardiometabolic disease manifestations during the period of life with highest incidence rates.
2. We will be able to quantify the extent to which the T2D associated co-morbidities coronary arteriosclerosis, cardiac autonomic neuropathy, non-alcoholic fatty liver disease (NAFLD), retinopathy, and diabetic kidney disease are present among elderly people without T2D, and with known normal glucose tolerance for two decades.
3. The availability of genome-wide genetic variation data, birthweight, as well as adiposity trajectories, dietary data, biomarkers of micronutrient status, and physical activity information, will provide insights into how these predisposing factors influence distinct organ morbidities and disease manifestations.
4. Collection of biospecimens for micronutrient and multi-omics purposes such as genomics, transcriptomics, proteomics, metabolomics, lipidomics, and epigenomics will allow additional layers of deep phenotype analyses, including studying disease-associated genetic variants and their phenotypes.
5. Limitations include the observational nature of the study precluding causality inferences. The fact that all individuals participated in a personalized lifestyle intervention from 1999 and for up to five years thereafter, may limit the generalizability of our findings.

### Box 1: The complex multifactorial pre- and postnatal etiology of cardiometabolic diseases

#### Constitutional primary predisposing factors

- Genetic susceptibility
- Intrauterine environment (low or high birth weight, prematurity)

#### Acquired postnatal secondary precipitating factors

- Sedentary lifestyle / inactivity
- Unhealthy diet / micronutrient deficiencies
- Obesity
- Smoking
- Medication
- Comorbidities
- Aging

## Introduction

---

1  
2  
3  
4  
5  
6 105 Type 2 diabetes (T2D), cardiovascular disease (CVD) and their co-morbidities are leading causes of  
7 premature mortality and morbidity, affecting nearly one billion individuals worldwide [1,2]. T2D is  
8 arbitrarily defined by elevations of plasma glucose levels, and the current T2D diagnostic criteria  
9 does not capture the diversity of T2D sub-phenotypes characterized by differential manifestations of  
10 micro - and macrovascular complications, as well as other common comorbidities [3,4].  
11  
12

13 110  
14 The overlap and heterogeneity of age-related T2D, CVD and associated comorbidities are likely  
15 rooted in the relative or predominant contributions from the triad of genetic susceptibility versus pre-  
16 and postnatal non-genetic etiologies (**Box 1**). As for genetics, the known 568 T2D susceptibility loci  
17 are estimated to explain 18% of the putative genetic contribution to T2D [5,6]. Early life  
18 developmental programming, low birth weight (LBW), as well as salt-sensitive hypertension, non-  
19 alcoholic fatty acid disease (NAFLD), dyslipidemia, and neurocognitive dysfunctions, are well-  
20 115 established risk factors of T2D and CVD [7–12]. Recent data even suggest that LBW, in a non-genetic  
21 manner, is associated with a more severe clinical T2D presentation and course, including earlier onset  
22 and more comorbidities at the time of diagnosis [13]. Accordingly, there is an increasing need to  
23 understand whether differential combinations of T2D etiologies influence not only T2D and CVD  
24 risk *per se*, but also the timing and patterns of clinical presentation including both early and late  
25 disease manifestations, as well as co-morbidities. As an example of unprioritized co-morbidities, T2D  
26 120 patients have a two-three-fold increased risk of sarcopenia [14,15]. Sarcopenia describes the age-  
27 related loss of muscle mass and strength that leads to impaired function including increased risk of  
28 falls and an overall decreased quality of life. Sarcopenia is accelerated by physical inactivity, low  
29 protein intake, and general health status and disease, and has also been associated with LBW [16].  
30  
31  
32  
33 125  
34  
35  
36

37 Excess dietary sodium ( $\text{Na}^+$ ) may account for three million deaths annually [17], and reducing salt  
38 intake is among the most cost-effective CVD prevention strategies [18]. Low dietary potassium ( $\text{K}^+$ )  
39 130 intake is also gaining attention as a CVD risk factor, and the urinary  $\text{Na}^+/\text{K}^+$ -ratio may therefore  
40 represent a superior cardiovascular risk measure [19–23]. As for macronutrient intake, high dietary  
41 sugar and saturated fat contents is strongly associated with T2D and CVD risk. While the  
42 Mediterranean diet may prevent CVD [24], there is nevertheless substantial gaps in our current  
43 knowledge of what defines a healthy diet with respect to not only macro but also micro nutritional  
44 composition(s) including vitamins. For instance, beyond effects on blood clotting factors, vitamin K  
45 135 may be important for cardiometabolic as well as bone health [25].  
46  
47  
48  
49

50 The Inter99 cohort provides a unique research platform to delineate the differential and overlapping  
51 roles of genetics versus the fetal environmental, as well as various postnatal lifestyle factors, for the  
52 development of early and overt cardiometabolic disease manifestations and associated co-morbidities  
53 140 [26–28]. We aim to perform a combined deep phenotyping and registry-based follow-up study of the  
54 Inter99 cohort, 20 years after the baseline health examinations, when participants were on average 46  
55 years of age. While overt disease diagnoses will be captured by Danish national registries, our deep  
56 phenotyping clinical examinations allow detection of a wider range of early disease manifestations,  
57 such as vascular stiffness, liver fibrosis, retinopathy, diabetic kidney disease, and prediabetes, and the  
58 145  
59  
60

1  
2  
3  
4 extent to which these may be present prior to the participants complying with official cardiometabolic  
5 disease diagnoses.  
6  
7  
8

## 9 **Methods and analysis**

---

### 11 *Study setting and previous findings*

12 150 The Inter99 study, initiated in March 1999, is a population-based multi-factorial intervention study,  
13 originally designed to prevent ischemic heart disease (IHD) [29]. It comprised all individuals born in  
14 1939-40, 1944-45, 1949-50, 1954-55, 1959-60, 1964-65, and 1969-70 (30, 35, 40, 45, 50, 55, and 60  
15 years of age) living in 11 municipalities in Greater Copenhagen (N=61,301).  
16

17 155 The population was randomized with different age and sex ratios to two lifestyle intervention groups  
18 (A+B; N=13,016) or a group followed by questionnaires (C; N=5,264), the remaining individuals  
19 were considered as a reference population and not contacted (D; N=43,021) (**Figure 1**). Participants  
20 received individualized lifestyle counseling based on lifestyle and CVD risk score [30]. In total, 6,784  
21 participants from the intervention groups participated in the baseline health examination (52%  
22 acceptance rate) [29]. The 5-year clinical follow-up examination, including glucose tolerance status,  
23 had a participation rate of 69% [31]. The 10-year follow-up was based on registry data and a follow-up  
24 questionnaire was sent to all eligible participants with completed baseline health examination (A+B)  
25 160 and to all in the paper survey group (C) (**Figure 1**) [32].

26 The 5-year follow-up examination showed a progression rate to overt T2D of 2.1 per 100 person-  
27 years [33], strongly supported by a substantially higher T2D prevalence after 20 years of follow-up  
28 with 6.5% of men and 3.8% in women having been diagnosed with T2D. Indeed, this will also be the  
29 case for all other T2D-associated vascular and cardiometabolic co-morbidities, underscoring the  
30 relevance of performing a combined registry-based and cardiometabolic deep phenotyping study  
31 among Inter99 participants, who are now 50-80 years old.  
32 165

33 Original midwife records were collected from 4,744 participants in the intervention groups [34,35],  
34 and despite the relatively low average age of 46 years in 1999, we confirmed a strong inverse  
35 relationship between birthweight and risk of T2D in this Danish population [35]. The Inter99 cohort  
36 has been extensively genotyped contributing to the identification of more than 568 T2D susceptibility  
37 loci [5], and to the interactions between birthweight and genetic risk of T2D [27,28,36]. The  
38 175 prevalence of T2D associated retinopathy in the Inter99 cohort was studied in a subgroup of 970  
39 participants. Interestingly, retinopathy was present in 7.5% of the 490 subjects with completely  
40 normal glucose tolerance, supporting the notion that factors other than elevated glucose contributes  
41 to the risk of retinopathy of a type that cannot be distinguished from milder degrees of diabetic  
42 retinopathy [37].  
43

44 180 The 10-year follow-up study concluded that a community-based, individually tailored intervention  
45 program with screening for risk of ischemic heart disease and repeated lifestyle intervention over 5  
46 years, had no effect on ischemic heart disease, stroke, or mortality at the population level as assessed  
47 after 10 years [38]. This observation was later reproduced in other studies and confirmed in a WHO  
48 report [39].  
49  
50  
51  
52  
53  
54  
55  
56  
57  
58  
59  
60



1  
2  
3  
4  
5  
6  
7  
8  
9  
10  
11  
12  
13  
14  
15  
16  
17  
18  
19  
20  
21  
22  
23  
24  
25  
26  
27  
28  
29  
30  
31  
32  
33  
34  
35  
36  
37  
38  
39  
40  
41  
42  
43  
44  
45  
46  
47  
48  
49  
50  
51  
52  
53  
54  
55  
56  
57  
58  
59  
60

185 The totality of data already available in the Inter99 cohort range from information on birth size (weight and length) and prematurity, glucose tolerance at baseline and at 5-year follow-up, lifestyle intervention and general health information including comprehensive dietary data, numerous biomarkers, and genetic data (**Table 1, Figure 2**). The 20-year follow-up study includes physical deep phenotyping clinical examinations tailored to capture and expand our growing understanding of T2D and subgroups, as well as early and late metabolic and vascular manifestations, co-morbidities, and complications. Morbidity and mortality data is obtained from our extensive Danish registers. The existing detailed clinical and lifestyle information over 20 years will allow us to correct for those determinants in the analysis. This together will allow us to detect effects of age-related cardiovascular and metabolic phenotypes.

195

### ***Deep phenotyping follow-up study***

#### ***Recruitment and clinical examinations***

A search of the Danish civil registration register (CPR register) in December 2019 showed that 6,004 (88.5%) of the Inter99 participants were alive and eligible for invitation (**Figure 1**).

200

All participants will be invited in the same order as examined at baseline to the clinical examination at The Center for Clinical Research and Prevention (CCRP) in Glostrup, Denmark. The first participant was examined on September 13, 2021. The data are collected in a highly standardized manner by trained health professionals. Data include repeated measures of the original health examinations (**Table 1**), studies of sub-clinical signs of early cardiometabolic changes using innovative technologies, lifestyle questionnaires, extended sub-studies of diet, activity, and glucose (the InterDAG study) and a vitamin K supplementation intervention (InterVitaminK trial) as well as collection of biological samples for a biobank (**Figure 2**) as described below and in detail in **Supplemental Methods**.

210

- ***Anthropometry and body composition***

Height is measured without shoes to the nearest cm, weight without shoes and overcoat to the nearest kg, and body mass index (BMI) calculated ( $\text{kg/m}^2$ ). Waist and hip circumferences are measured in cm using a non-stretchable tape and waist-to-hip ratio calculated. Segmental body composition is estimated from multi-frequency bioelectrical impedance analysis (InBody770, Biospace, Seoul, South Korea).

215

- ***Arterial stiffness***

Arterial stiffness is assessed by the gold standard method of assessing direct arterial stiffness based on carotid-femoral Pulse Wave Velocity (cfPWV) using the SphygmoCor XCEL instrument (AtCor Medical, Sydney, Australia) [25].

220

- ***Biobank***

Serum, plasma, and plasma urine will be collected from all participants. In a subgroup participating in the extended study on Diet, Activity and Glucose (InterDAG study) 24-hour urine samples and a fecal sample will be collected. This biobank allows for future analyses of selected biomarkers and multi-omics.

225

1  
2  
3  
4  
5  
6 • *Blood biochemistry*

7 Fasting blood samples (minimum of six hours) (**Table 1**) are collected and analyzed within three  
8 hours (**Supplemental Methods**).  
9 230

10  
11 • *Blood pressure*

12 Blood pressure is measured thrice with an electronic blood pressure monitor (Microlife, Widnau,  
13 Switzerland) and fitting cuff after five minutes rest in sitting position.  
14

15 235  
16 • *Cardiac autonomic neuropathy*

17 As a measure of cardiac autonomic neuropathy, simple bedside tests using resting heart rate  
18 variability (HRV) indices or response in heart rate to standing, slow breathing, or the Valsalva  
19 maneuver (cardiovascular autonomic reflex tests [CARTs]) is used with a Vagus device (Medicus  
20 Engineering, Aarhus, Denmark) [40,41].  
21 240

22  
23  
24 • *Cardiac CT*

25 All participants are offered a cardiac computerized tomography (CT) scan at the Department of  
26 Cardiology, Rigshospitalet in Copenhagen to determine coronary atherosclerosis, including  
27 coronary artery calcification score (CAC score), coronary stenosis, vascular extent and plaque  
28 type in addition to cardiac chamber size and left ventricular hypertrophy. The cardiac CT scan  
29 245 includes a non-contrast CT scan and a CT angiography performed using the 320-multidetector  
30 scanner (Aquilion One, Toshiba Medical Systems, Japan) [42,43]. In addition to cardiac risk  
31 assessment, the CT scan includes comprehensive imaging of lungs, vascular system, sarcopenia  
32 assessment, liver, spleen, abdominal fat, and spine.  
33 250  
34

35  
36  
37 • *Covariates*

38 At baseline participants answered a questionnaire on sex, age, marital status, occupation,  
39 education, health (diagnoses of, e.g., cancer, diabetes, hypertension, high cholesterol, myocardial  
40 infarction, stroke, or coeliac disease) and lifestyle (physical activity, smoking, alcohol, and dietary  
41 habits) [29]. At follow-up participants answer additional questions on sarcopenia symptoms,  
42 255 sleep, sedentary behavior and physical activity [44–46].  
43  
44  
45

46  
47 *Heart rhythm*

48 260 Electrocardiography (ECG) is performed using 12 electrodes, recorded at 500Kz with a 10 second  
49 duration using the Cardiosoft system (GE Healthcare, Milwaukee, WI, USA). The Marquette  
50 12SL algorithm (v. 21, GE Healthcare, Milwaukee, WI, USA) is used to obtain median beats as  
51 well as markers for P-wave/QRS wave onset and offset ( $QRS_{on}$ ,  $QRS_{off}$ ) and T-wave offset ( $T_{off}$ )  
52 [47]. ECG diagnoses are made by the 12SL algorithm.  
53  
54

55 265  
56 • *Liver stiffness and steatosis*  
57  
58  
59  
60

1  
2  
3  
4 Noninvasive assessment of liver stiffness by transient elastography (TE) is performed after a  
5 minimum of 4-hrs fasting (FibroScan 502 Touch, Echosens, Baarn, Netherlands). The FIB-4  
6 (Fibrosis-4) score will be calculated [48].  
7

270

8  
9  
10 • *Muscle strength (hand grip and chair stand)*

11 Muscular fitness is assessed using standardized protocols of muscle performance in the upper and  
12 lower extremity. Hand grip is measured using a Jamar® dynamometer (Sammons Preston Rolyan,  
13 Chicago, IL, USA) [49]. Lower body muscle performance is measured using the Sit-to-Stand test  
14 (STS) [50].  
15 275

16  
17  
18 • *Oxygen saturation*

19 Oxygen saturation is determined by direct measurement with the Nellcor™ portable SpO<sub>2</sub> pulse  
20 oximeter after blood sampling and 0 minutes rest in the supine position. Measurements is taken  
21 in the index finger of the opposite arm of blood sampling (Medtronic, Minneapolis, MN, USA).  
22 280

23  
24  
25 • *Fundus characteristics*

26 Ocular wide-field fundus photography and optical coherence tomography (OCT) are made in both  
27 eyes using the Optos Monaco device (Optos PLC, Dunfermline, UK) [51]. Images and scans are  
28 graded for retinopathy according to a modified version of the ‘Proposed International Clinical DR  
29 severity scale’ [52] applying a deep learning algorithm by convolutional neural networks [53].  
30 285

31  
32  
33 • *Urine*

34 A spot urine sample is collected and analyzed for sodium, potassium, albumin, and creatinine  
35 concentration.  
36 290

37  
38 ***Extended clinical studies***

39 The study serves as a recruitment platform for the InterVitaminK Randomized Controlled Trial [25],  
40 as well as for the extended lifestyle and diurnal plasma glucose profiling InterDAG study as described  
41 below and in details in the **Supplemental Methods**.  
42 295

43  
44 ***InterVitaminK trial***

45 All participants with detectable coronary arterial calcification ( $CAC \geq 10$  Agatston units) assessed by  
46 the cardiac CT scan are invited to participate in the double-blinded placebo-controlled randomized  
47 intervention trial, the InterVitaminK trial (**Table 1, Figure 2**) as previously outlined [25].  
48 300

49  
50 ***InterDAG study (Diet, Activity, and Glucose)***

51 Glucose levels are measured continuously for 10 days using continuous glucose monitoring (CGM)  
52 (Dexcom G6 PRO, Hudson, OH, USA). Simultaneously, comprehensive data on dietary intakes are  
53 collected, including urinary sodium and potassium, and physical activity simultaneous collection of  
54 a 7-day food record (MyFood24, [www.myfood24.org](http://www.myfood24.org)), 10-day physical activity (24-hour Sens  
55 305 Motion® accelerometers, [www.sens.dk](http://www.sens.dk), Copenhagen, Denmark). Participants are also invited for a  
56 3-day repeated 24-hour urine collection and one single fecal collection for later analyses.  
57  
58  
59  
60

1  
2  
3  
4 The simultaneous measurements of daily physical activity and diet will increase our understanding  
5 of the extent to which current lifestyle in older people influence, not only glucose regulation and  
6 310 variability, but also cardiometabolic health in general, including ectopic fat deposition, sarcopenia,  
7 and early vascular dysfunctions. The 24-hour urine collection will provide unique data on the sodium  
8 to potassium ratio, while the gut microbiota from fecal samples will provide insights into interaction  
9 between microbiota and metabolic diseases [54–56].  
10  
11

### 12 315 ***Register-based follow-up of the Inter99 cohort***

13  
14 The Inter99 cohort is linked to the nationwide Danish registries by the unique Danish CPR number.  
15 The registries cover hospital admissions, outpatient contacts, primary health care use, reimbursement  
16 of medicine, and a variety of social parameters (education, income, employment, ethnicity etc.).  
17 Information on date of T2D diagnosis is obtained from a newly established Danish Diabetes Register  
18 (DMreg) based on comprehensive data from the National Patient Register [57], the Medicines  
19 320 Products Register [58], the National Health Service Registry [59], the Danish Adult Diabetes  
20 Database [60], and the Eye Examination Database [61]. The algorithm calculating the date of diabetes  
21 diagnosis is described elsewhere [62]. Clinical and biochemical data to estimate trajectories following  
22 T2D diagnosis will be obtained from LABKA (Clinical Laboratory Information System Research  
23 Database) [63]. Information on date of various CVD and cerebrovascular disease diagnoses is based  
24 on the Danish National Patient Register [64], using International Classification of Diseases (ICD-10)  
25 325 codes. CVD is defined as atrial fibrillation, heart failure, hypertensive disease, ischemic heart disease.  
26 Cerebrovascular disease is defined as haemorrhagic stroke, ischemic stroke, and transient cerebral  
27 ischemia. Occurrence of macrovascular atherosclerotic disease will also be available from the  
28 registers.  
29  
30  
31  
32 330  
33  
34  
35

### 36 **Data analysis plan**

---

37  
38 As described in Table 1, this study will provide a wealth of data and future analyses strategies will  
39 335 depend on the outcome in focus. The statistical methods described below serves as an example of the  
40 methods most likely to be used, while alternative approaches will be applied when appropriate.  
41  
42

### 43 ***Statistics***

44 For the register-based follow-up studies, Poisson regression and other time to event models (e.g., Cox  
45 proportional hazards models) will be applied to estimate incidence rates and hazard ratios with 95%  
46 340 confidence intervals, respectively, of clinical outcomes like T2D and CVD. Relevant covariates such  
47 as socioeconomic factors, adult BMI, and gene risk scores of cardiometabolic morbidity and obesity  
48 will be adjusted for in separate models. In other analysis, we will use multilevel longitudinal  
49 modelling to estimate clinical trajectories of markers of glycated hemoglobin, lipid levels, blood  
50 pressure, body mass index and kidney function as a function of various lifestyle-related and perinatal  
51 345 (e.g., birthweight) exposures.  
52

53 For the 20-year cardiometabolic outcome follow-up study both binary (e.g., hypertension and  
54 retinopathy), categorical (e.g., sarcopenia and muscle strength) and continuous outcomes (e.g., CAC  
55 score, fibrosis score, polygenetic risk scores, and body composition) will be investigated. We will  
56  
57  
58  
59  
60

1  
2  
3  
4  
5  
6  
7  
8  
9  
10  
11  
12  
13  
14  
15  
16  
17  
18  
19  
20  
21  
22  
23  
24  
25  
26  
27  
28  
29  
30  
31  
32  
33  
34  
35  
36  
37  
38  
39  
40  
41  
42  
43  
44  
45  
46  
47  
48  
49  
50  
51  
52  
53  
54  
55  
56  
57  
58  
59  
60

350 use multiple logistic regression for binary outcomes, multinomial logistic regression for categorical outcomes and multiple linear regression for continuous outcomes. For each outcome, a series of models will be developed based on a priori knowledge about the causal framework around the association of interest. To assess the strength and direction of associations, we will report odds ratios and regression coefficients with corresponding 95% confidence intervals.

355

We will apply causal epidemiological techniques to identify and quantify the causal relationships of various lifestyle-related, genetic, and perinatal (e.g., birthweight) exposures with cardiometabolic outcomes, while predictive modeling will be applied to develop algorithms that can predict future disease risk. While classical statistical prediction modelling will be using risk factors identified from existing literature, machine learning techniques will be applied to develop prediction algorithms using a much wider spectrum of the available of data. As the clinical relevance has been an integral part of this study from the beginning, we aim to develop a series of interactive clinical tools that apply the developed prediction models for various cardiometabolic disease outcomes such as a T2D and CVD risk engine calculators. The combination of the wealth of cardiometabolic deep phenotyping data from the ongoing 20-year follow-up, polygenetic risk scores, lifestyle factors and perinatal factors such as objectively measured birth weight in a large sample of aging adults, provides a hitherto unparalleled potential for the development of real personalized risk prediction tools.

365

## Ethics

---

370 Informed consent is obtained from all participants before clinical examinations and the study is conducted in accordance with the Declaration of Helsinki II and approved by the ethical committee of the Capital Region, Denmark (Inter99 Follow-up H-21033114) and (InterVitaminK trial H-20076231) and by the Danish Data Protection Agency (P-2020-1074). Clinicaltrials.gov registration: NCT05166447 and NCT05259046 respectively. Examinations are considered harmless, involve minimal inconvenience, and are performed by experienced healthcare professionals.

375

## Perspectives

---

The Inter99 cohort has contributed substantially to our understanding of the multifactorial origin, natural history, as well as potential for early detection and prevention of T2D and its associated cardiometabolic co-morbidities. While it, from a modern epidemiologic perspective may appear relatively small, the Inter99 cohort is firmly established as an international competitive cardiometabolic epidemiological research resource due to its high data quality and data richness. As such, there is a strong foundation and a very high potential to perform a 20-year follow-up study of the now 50- to 80-year-old Inter99 participants.

380

385 So far, clinical reexaminations of the Inter99 cohort have been performed after 1, 3 and 5 years, and registry follow-up studies after 10 years. The planned 20-years follow-up study will include a combination of innovative cardiometabolic deep-phenotyping clinical examinations combined with comprehensive Danish national registry follow-up studies. While the Danish registries captures overt T2D and co-morbidity diagnoses, as well as use of medications, hospital admissions, selected

1  
2  
3  
4 390 biochemical analyses, etc., a parallel and synergistic deep phenotyping study will allow us to  
5 determine several of the most important early disease manifestations present even prior to any official  
6 and often arbitrary cardiometabolic disease diagnosis criteria. Accordingly, the complementary study  
7 approaches will enable us to quantify the extent to which the T2D associated co-morbidities coronary  
8 arteriosclerosis, cardiac autonomic neuropathy, coronary calcification, NAFLD, retinopathy, and  
9 diabetic kidney disease are present among elderly people without T2D and with a known normal  
10 glucose tolerance for two decades. The existing comprehensive genetic, birthweight, and lifestyle  
11 395 information, collected and analyzed over 20 years, provides unparalleled opportunities to determine  
12 how individual or groups of risk factors affect the natural history of overt and/or preclinical disease  
13 manifestations during the most relevant age window with the highest occurrence rates of T2D and  
14 associated cardiometabolic diseases. The complementary data most importantly increases our signal  
15 to noise ratio, and thus statistical power, to detect the relative contribution of a variety of distinct risk  
16 factors. For instance, having near complete GWAS data allows adjustment for putative genetic  
17 400 confounders influencing associations between birthweight and overt or preclinical disease. All pieces  
18 of information with high importance to understand the heterogeneity, and thus for driving, innovating,  
19 and implementing precision medicine, of T2D and co-morbidities.  
20  
21  
22  
23  
24 405

25  
26 The major etiological factors underlying risk of T2D, and its co-morbidities include genetics on one  
27 side, and pre- and postnatal environmental exposures on the other (**Box 1**). As for risk factors in  
28 pregnancy, the remarkably most accurate marker predicting cardiometabolic disease is weight at the  
29 time of birth [65,66]. While there has been much focus on identifying more specific exposures  
30 underlying the association between LBW and disease risk, no single factor influencing fetal growth  
31 410 during pregnancy has yet been identified to explain the association. In contrast, multiple  
32 epidemiological and animal studies have documented that virtually all factors in pregnancy that  
33 negatively influence fetal growth and birthweight including maternal smoking, diet, and energy  
34 intake, reduced placental blood flow etc. are associated with increased risk of cardiometabolic  
35 diseases in the offspring [67]. Accordingly, rather than representing only a risk marker, LBW may  
36 represent a mediator of the totality of adverse events and lifestyle factors in pregnancy that influence  
37 later risk of cardiometabolic diseases in the offspring, justifying birthweight as the so far unparalleled  
38 415 cardiometabolic risk marker of prenatal disease exposures.  
39  
40  
41  
42  
43

44 Based on the Inter99 baseline health examinations, we previously confirmed LBW to be associated  
45 420 with T2D prevalence at a mean age of only 46 years [35]. As the first 20-year follow-up initiative,  
46 we studied the association between birthweight and T2D incidence rates [68]. Using the Danish  
47 registries, birth records of 4,590 Inter99 participants were linked with age at T2D diagnosis, as well  
48 as relevant covariates. We identified 492 new T2D cases since 1999, and subsequently documented  
49 that T2D incidence rate decreased with increasing birthweight in a surprisingly linear manner [68].  
50 Interestingly, our study clearly supported the notion that the other major etiological factors of genetics  
51 and obesity appeared to operate as independent and most likely additive risk factors on top of that of  
52 425 lower birthweight [68].  
53  
54  
55

56 Further comprehensive registry analyses of the full range of T2D vascular complications and co-  
57 morbidities will provide unparalleled insights into previously unrecognized differential T2D and co-  
58  
59  
60

1  
2  
3  
4  
5  
6  
7  
8  
9  
10  
11  
12  
13  
14  
15  
16  
17  
18  
19  
20  
21  
22  
23  
24  
25  
26  
27  
28  
29  
30  
31  
32  
33  
34  
35  
36  
37  
38  
39  
40  
41  
42  
43  
44  
45  
46  
47  
48  
49  
50  
51  
52  
53  
54  
55  
56  
57  
58  
59  
60

430 morbidity sub-phenotypes and their underlying etiologies. Here, we for example can determine the extent to which T2D patients with the lowest birthweights may be characterized by a more severe clinical presentation as recently suggested [13]. To improve our understanding of T2D and its sub-phenotypes, similar analytical strategies will be applied for the various early disease markers and manifestations determined in the deep phenotyping clinical follow-up study.

435 The extended InterDAG subgroup study is aiming to better understand (and adjust for) the impact of diet, whole body sodium and potassium balance, as well as physical activity, on diurnal glucose levels and fluctuations across a wide range of the glucose tolerance spectra. Blood samples available from the baseline health examinations, along with samples from the reexaminations, will be available for extended micronutrient and multi-omics analyses including whole genome sequencing, 440 metabolomics, lipidomics, transcriptomics, epigenomics, proteomics, and metagenomics. Our vision includes extensive application of AI based analyses to integrate the clinical, biochemical, and genetic data over time, across and beyond current clinical diagnostic cardiometabolic disease criteria.

The Inter99 20-year follow-up study furthermore provides a unique opportunity to study age-related outcomes, such as sarcopenia and physical function. It is well established that lifestyle (diet, physical 445 activity, smoking and BMI) influences the risk of chronic disease, thus Inter99 20-year data will allow for the study of long-term impact of lifestyle in early adulthood on subsequent age-related disease manifestations. These data will for instance allow us to study the trends in dietary habits and physical activity patterns and their impact on muscle strength and function in middle- and old age in people with and without T2D or CVD. As such, our Inter99 follow-up study will provide important insights 450 into the mechanisms underlying age-related processes in both healthy and diseased individuals.

In conclusion, the current combined epidemiological registry and deep phenotyping 20-year clinical follow-up study provides an example of the value of reexamining an existing and already extensively characterized T2D and cardiometabolic cohort, with the overall aim to better understand etiologically distinct disease trajectories and sub-phenotypes. This will facilitate development of better and more 455 efficacious precision medicine prediction, clinical care, as well as overall treatment approaches in T2D and associated diseases. The cohort data will via a scientific steering group be available for international collaborations.

### Acknowledgements

460 Thank you to the Inter99 participants for their invaluable contribution to the 20-year follow-up study. We also thank our team at CCRP, Glostrup, Denmark including Thomas Meinertz Dantoft, Anne-Mette Bergmann, Pernille Hesselholt Geer, Gert Mehl Virenfeldt, Nanna Riis, Anna Stage Hansen, Emil Buch Fromberg, Tina Rasmussen, Ida Foss Engelsted, Henriette Levin, Ane Lund Hjortshøj, Karen Vrdlovec Holck, Charlotte Wibling for securing a second-to-none data collection. Evy Ottesen 465 and Kirsten Piepgras Neergaard from Corelab, SDCC, Herlev, Denmark for providing technical assistance.

### Author contributions

1  
2  
3  
4 KB and CB drafted the first version of the manuscript. AV and AL initiated the study. KB, CB, MA,  
5 FBK, CFBN, BL, RW, CS, KN, NRJ, CSU, MK, NG, JK, LML, LK, ALM, KFK, RL, TH, AL, AV  
6 470 designed and managed the study. All authors critically reviewed the manuscript, read, and approved  
7 the final version of the manuscript.  
8  
9

### 10 **Funding**

11  
12 475 The 20-year follow-up study is initiated by Professor, Chief Physician, PhD, DMSc. Allan Vaag (co-  
13 PI) Steno Diabetes Center Copenhagen (SDCC) and Professor Allan Linneberg (co-PI) the Center for  
14 Clinical Research and Prevention (CCRP). SDCC and CCRP have funded the clinical follow-up  
15 examinations. The following institutions have further contributed to the data collection including,  
16 The Novo Nordisk Foundation Center for Basic Metabolic Research, University of Copenhagen, The  
17 Laboratory of Genomics and Biomedicine, Department of Biology, University of Copenhagen, The  
18 480 Institute of Sports Medicine, Bispebjerg Hospital, Copenhagen, The Danish Diabetes Academy.  
19  
20  
21  
22

### 23 **Competing interest**

24 None declared.  
25  
26 485

### 27 **Patient and public involvement**

28 Patients and/or the public were not involved in the design, or conduct, or reporting, or dissemination  
29 plans of this research.  
30  
31  
32  
33  
34 490  
35  
36  
37  
38  
39  
40  
41  
42  
43  
44 495  
45  
46  
47  
48  
49  
50  
51  
52  
53 500  
54  
55  
56  
57  
58  
59  
60



## References

- 1 International Diabetes Atlas. IDF Diabetes Atlas 2021. 2021. <https://diabetesatlas.org/atlas/tenth-edition/>
- 2 Roth GA, Mensah GA, Johnson CO, *et al*. Global Burden of Cardiovascular Diseases and Risk Factors, 1990-2019: Update From the GBD 2019 Study. *J Am Coll Cardiol* 2020;**76**:2982–3021. doi:10.1016/j.jacc.2020.11.010
- 3 Gedebjerg A, Almdal TP, Berencsi K, *et al*. Prevalence of micro- and macrovascular diabetes complications at time of type 2 diabetes diagnosis and associated clinical characteristics: A cross-sectional baseline study of 6958 patients in the Danish DD2 cohort. *J Diabetes Complications* 2018;**32**:34–40. doi:10.1016/j.jdiacomp.2017.09.010
- 4 Tomic D, Shaw JE, Magliano DJ. The burden and risks of emerging complications of diabetes mellitus. *Nat Rev Endocrinol* 2022;**18**:525–39. doi:10.1038/s41574-022-00690-7
- 5 Vujkovic M, Keaton JM, Lynch JA, *et al*. Discovery of 318 new risk loci for type 2 diabetes and related vascular outcomes among 1.4 million participants in a multi-ancestry meta-analysis. *Nat Genet* 2020;**52**:680–91. doi:10.1038/s41588-020-0637-y
- 6 Mahajan A, Taliun D, Thurner M, *et al*. Fine-mapping type 2 diabetes loci to single-variant resolution using high-density imputation and islet-specific epigenome maps. *Nat Genet* 2018;**50**:1505–13. doi:10.1038/s41588-018-0241-6
- 7 Hales CN, Barker DJ, Clark PM, *et al*. Fetal and infant growth and impaired glucose tolerance at age 64. *BMJ* 1991;**303**:1019–22. doi:10.1136/bmj.303.6809.1019
- 8 Ravelli ACJ, van der Meulen JHP, Michels RPJ, *et al*. Glucose tolerance in adults after prenatal exposure to famine. *The Lancet* 1998;**351**:173–7. doi:10.1016/s0140-6736(97)07244-9
- 9 Wu L, Feng X, He A, *et al*. Prenatal exposure to the Great Chinese Famine and mid-age hypertension. *PLoS One* 2017;**12**. doi:10.1371/journal.pone.0176413
- 10 Tarry-Adkins JL, Ozanne SE. Nutrition in early life and age-associated diseases. *Ageing Res Rev.* 2017;**39**:96–105. doi:10.1016/j.arr.2016.08.003
- 11 Vaag AA, Grunnet LG, Arora GP, *et al*. The thrifty phenotype hypothesis revisited. *Diabetologia* 2012;**55**:2085–8. doi:10.1007/s00125-012-2589-y
- 12 Brøns C, Thuesen ACB, Elingaard-Larsen LO, *et al*. Increased liver fat associates with severe metabolic perturbations in low birth weight men. *Eur J Endocrinol* 2022;**186**:511–21. doi:10.1530/EJE-21-1221
- 13 Hansen AL, Thomsen RW, Brøns C, *et al*. Birthweight is associated with clinical characteristics in people with recently diagnosed type 2 diabetes. *Diabetologia* 2023;**1**. doi:10.1007/s00125-023-05936-1

- 1  
2  
3  
4 14 Seok WP, Goodpaster BH, Strotmeyer ES, *et al.* Accelerated loss of skeletal muscle strength  
5 in older adults with type 2 diabetes: the health, aging, and body composition study. *Diabetes*  
6 *Care* 2007;**30**:1507–12. doi:10.2337/DC06-2537  
7 540
- 8  
9 15 Koo BK, Roh E, Yang YS, *et al.* Difference between old and young adults in contribution of  
10  $\beta$ -cell function and sarcopenia in developing diabetes mellitus. *J Diabetes Investig*  
11 2016;**7**:233–40. doi:10.1111/JDI.12392  
12
- 13  
14 16 Sayer AA, Syddall HE, Gilbody HJ, *et al.* Does sarcopenia originate in early life? Findings  
15 545 from the Hertfordshire Cohort Study. *Journals of Gerontology - Series A Biological Sciences*  
16 *and Medical Sciences* 2004;**59**:930–4. doi:10.1093/gerona/59.9.m930  
17
- 18  
19 17 Afshin A, Sur PJ, Fay KA, *et al.* Health effects of dietary risks in 195 countries, 1990–2017:  
20 a systematic analysis for the Global Burden of Disease Study 2017. *The Lancet*  
21 2019;**393**:1958–72. doi:10.1016/S0140-6736(19)30041-8  
22
- 23  
24 550 18 WHO. Tackling NCDs: ‘best buys’ and other recommended interventions for the prevention  
25 and control of noncommunicable diseases. 2017.  
26
- 27  
28 19 Binia A, Jaeger J, Hu Y, *et al.* Daily potassium intake and sodium-to-potassium ratio in the  
29 reduction of blood pressure: a meta-analysis of randomized controlled trials. *J Hypertens*  
30 2015;**33**:1509–20. doi:10.1097/HJH.0000000000000611  
31
- 32  
33 555 20 Aburto NJ, Hanson S, Gutierrez H, *et al.* Effect of increased potassium intake on  
34 cardiovascular risk factors and disease: systematic review and meta-analyses. *BMJ* 2013;**346**.  
35 doi:10.1136/BMJ.F1378  
36
- 37 560 21 Perez V, Chang ET. Sodium-to-potassium ratio and blood pressure, hypertension, and related  
38 factors. *Adv Nutr* 2014;**5**:712–41. doi:10.3945/AN.114.006783  
39
- 40  
41 22 Stamler R. Implications of the INTERSALT study. *Hypertension* 1991;**17**:16–20.  
42 doi:10.1161/01.HYP.17.1\_SUPPL.116  
43
- 44  
45 23 Stamler J, Rose G, Stamler R, *et al.* INTERSALT study findings. Public health and medical  
46 care implications. *Hypertension* 1989;**14**:570–7. doi:10.1161/01.HYP.14.5.570  
47
- 48  
49 24 Estruch R, Ros E, Salas-Salvadó J, *et al.* Primary Prevention of Cardiovascular Disease with  
50 a Mediterranean Diet Supplemented with Extra-Virgin Olive Oil or Nuts. *N Engl J Med*  
51 2018;**378**:e34. doi:10.1056/NEJMOA1800389  
52 570
- 53  
54 25 Kampmann FB, Thyssen SM, Nielsen CFB, *et al.* Study protocol of the InterVitaminK trial: a  
55 Danish population-based randomised double-blinded placebo-controlled trial of the effects of  
56 vitamin K (menaquinone-7) supplementation on cardiovascular, metabolic and bone health.  
57 *BMJ Open* 2023;**13**:e071885. doi:10.1136/bmjopen-2023-071885  
58
- 59  
60 26 Horikoshi M, Yaghoobkar H, Mook-Kanamori DO, *et al.* New loci associated with birth  
weight identify genetic links between intrauterine growth and adult height and metabolism.  
*NatGenet* 2012;**45**:76–82. doi:10.1038/ng.2477

1  
2  
3  
4  
5  
6  
7  
8  
9  
10  
11  
12  
13  
14  
15  
16  
17  
18  
19  
20  
21  
22  
23  
24  
25  
26  
27  
28  
29  
30  
31  
32  
33  
34  
35  
36  
37  
38  
39  
40  
41  
42  
43  
44  
45  
46  
47  
48  
49  
50  
51  
52  
53  
54  
55  
56  
57  
58  
59  
60

- 27 Warrington NM, Beaumont RN, Horikoshi M, *et al.* Maternal and fetal genetic effects on birth weight and their relevance to cardio-metabolic risk factors. *Nat Genet* 2019;**51**:804–14. doi:10.1038/s41588-019-0403-1
- 28 Horikoshi M, Beaumont RN, Day FR, *et al.* Genome-wide associations for birth weight and correlations with adult disease. *Nature* 2016;**538**:248–52. doi:10.1038/nature19806
- 29 Jørgensen T, Borch-Johnsen K, Thomsen TF, *et al.* A randomized non-pharmacological intervention study for prevention of ischaemic heart disease: baseline results Inter99. *Eur J Cardiovasc Prev Rehabil* 2003;**10**:377–86. doi:10.1097/01.hjr.0000096541.30533.82
- 30 Thomsen TF, Davidsen M, Ibsen H, *et al.* A New Method for Chd Prediction and Prevention Based on Regional Risk Scores and Randomized Clinical Trials; PRECARD(R) and the Copenhagen Risk Score. *European Journal of Cardiovascular Prevention & Rehabilitation* 2001;**8**:291–7. doi:10.1177/174182670100800508
- 31 Lau C, Vistisen D, Toft U, *et al.* The effects of adding group-based lifestyle counselling to individual counselling on changes in plasma glucose levels in a randomized controlled trial: the Inter99 study. *Diabetes Metab* 2011;**37**:546–52. doi:10.1016/j.diabet.2011.06.001
- 32 Lau CJ, Pisinger C, Husemoen LLN, *et al.* Effect of general health screening and lifestyle counselling on incidence of diabetes in general population: Inter99 randomised trial. *Prev Med (Baltim)* 2016;**91**:172–9. doi:10.1016/j.ypmed.2016.08.016
- 33 Engberg S, Vistisen D, Lau C, *et al.* Progression to impaired glucose regulation and diabetes in the population-based Inter99 study. *Diabetes Care* 2009;**32**:606–11. doi:10.2337/dc08-1869
- 34 Pilgaard K, Færch K, Poulsen P, *et al.* Impact of size at birth and prematurity on adult anthropometry in 4744 middle-aged Danes – The Inter99 study. *J Dev Orig Health Dis* 2010;**1**:319–28. doi:10.1017/S2040174410000413
- 35 Pilgaard K, Faerch K, Carstensen B, *et al.* Low birthweight and premature birth are both associated with type 2 diabetes in a random sample of middle-aged Danes. *Diabetologia* 2010;**53**:2526–30. doi:10.1007/s00125-010-1917-3
- 36 Horikoshi M, Yaghoobkar H, Mook-Kanamori DO, *et al.* New loci associated with birth weight identify genetic links between intrauterine growth and adult height and metabolism. *Nat Genet* 2013;**45**:76–82. doi:10.1038/ng.2477
- 37 Munch IC, Larsen M, Kessel L, *et al.* Cumulative glycemia and microangiopathy in subjects with impaired glucose regulation in the Inter99 study. *Diabetes Res Clin Pract* 2011;**91**:226–32. doi:10.1016/j.diabres.2010.10.017
- 38 Jørgensen T, Jacobsen RK, Toft U, *et al.* Effect of screening and lifestyle counselling on incidence of ischaemic heart disease in general population: Inter99 randomised trial. *BMJ (Online)* 2014;**348**. doi:10.1136/bmj.g3617

- 1  
2  
3  
4 610 39 Eriksen CU, Rotar O, Toft U, *et al.* What is the effectiveness of systematic population-level  
5 screening programmes for reducing the burden of cardiovascular diseases? Copenhagen:  
6 2021.  
7  
8  
9 40 Spallone V, Bellavere F, Scionti L, *et al.* Recommendations for the use of cardiovascular  
10 tests in diagnosing diabetic autonomic neuropathy \*. *Nutrition, Metabolism and*  
11 615 *Cardiovascular Diseases* 2011;**21**:69–78. doi:10.1016/j.numecd.2010.07.005  
12  
13 41 Hansen CS, Theilade S, Lajer M, *et al.* Cardiovascular autonomic neuropathy and bone  
14 metabolism in Type 1 diabetes. *Diabetic Medicine* 2018;**35**:1596–604.  
15 doi:10.1111/dme.13777  
16  
17 42 Fuchs A, Kühl JT, Sigvardsen PE, *et al.* Subclinical Coronary Atherosclerosis and Risk for  
18 Myocardial Infarction in a Danish Cohort A Prospective Observational Cohort Study. *Ann*  
19 620 *Intern Med* 2023;**176**:574–5. doi:10.7326/M22-3027  
20  
21 43 McDermott M, Newby DE. Contemporary Natural History of Coronary Artery Disease. *Ann*  
22 *Intern Med* 2023;**176**:574–5. doi:10.7326/M23-0533  
23  
24 44 Malmstrom TK, Miller DK, Simonsick EM, *et al.* SARC-F: a symptom score to predict  
25 persons with sarcopenia at risk for poor functional outcomes. *J Cachexia Sarcopenia Muscle*  
26 625 2016;**7**:28–36. doi:10.1002/jcsm.12048  
27  
28 45 Aadahl M, Jørgensen T. Validation of a New Self-Report Instrument for Measuring Physical  
29 Activity. *Med Sci Sports Exerc* 2003;**35**:1196–202.  
30 doi:10.1249/01.MSS.0000074446.02192.14  
31  
32 46 Malmstrom TK, Morley JE. SARC-F: a simple questionnaire to rapidly diagnose sarcopenia.  
33 *J Am Med Dir Assoc* 2013;**14**:531–2. doi:10.1016/J.JAMDA.2013.05.018  
34 630  
35  
36 47 Kück K, Isaksen JL, Graff C, *et al.* Spatial QRS-T angle variants for prediction of all-cause  
37 mortality. *J Electrocardiol* 2018;**51**:768–75. doi:10.1016/j.jelectrocard.2018.05.011  
38  
39 48 McPherson S, Stewart SF, Henderson E, *et al.* Simple non-invasive fibrosis scoring systems  
40 can reliably exclude advanced fibrosis in patients with non-alcoholic fatty liver disease. *Gut*  
41 635 2010;**59**:1265–9. doi:10.1136/GUT.2010.216077  
42  
43 49 Aadahl M, Beyer N, Linneberg A, *et al.* Grip strength and lower limb extension power in 19-  
44 72-year-old Danish men and women: the Health2006 study. *BMJ Open* 2011;**1**:e000192–  
45 e000192. doi:10.1136/bmjopen-2011-000192  
46  
47 50 Alcazar J, Losa-Reyna J, Rodriguez-Lopez C, *et al.* The sit-to-stand muscle power test: An  
48 easy, inexpensive and portable procedure to assess muscle power in older people. *Exp*  
49 640 *Gerontol* 2018;**112**:38–43. doi:10.1016/j.exger.2018.08.006  
50  
51 51 Byberg S, Vistisen D, Diaz L, *et al.* Optos wide-field imaging versus conventional camera  
52 imaging in Danish patients with type 2 diabetes. *Acta Ophthalmol* 2019;**97**:815–20.  
53 645 doi:10.1111/aos.14118  
54  
55  
56  
57  
58  
59  
60

1  
2  
3  
4  
5  
6  
7  
8  
9  
10  
11  
12  
13  
14  
15  
16  
17  
18  
19  
20  
21  
22  
23  
24  
25  
26  
27  
28  
29  
30  
31  
32  
33  
34  
35  
36  
37  
38  
39  
40  
41  
42  
43  
44  
45  
46  
47  
48  
49  
50  
51  
52  
53  
54  
55  
56  
57  
58  
59  
60

- 52 Wilkinson CP, Ferris FL, Klein RE, *et al.* Proposed international clinical diabetic retinopathy and diabetic macular edema disease severity scales. *Ophthalmology* 2003;**110**:1677–82. doi:10.1016/S0161-6420(03)00475-5
- 53 Lecun Y, Bengio Y, Hinton G. Deep learning. *Nature*. 2015;**521**:436–44. doi:10.1038/nature14539
- 54 Forslund K, Hildebrand F, Nielsen T, *et al.* Disentangling type 2 diabetes and metformin treatment signatures in the human gut microbiota. *Nature* 2015;**528**:262–6. doi:10.1038/nature15766
- 55 Qin J, Li Y, Cai Z, *et al.* A metagenome-wide association study of gut microbiota in type 2 diabetes. *Nature* 2012;**490**:55–60. doi:10.1038/nature11450
- 56 Jie Z, Xia H, Zhong S-L, *et al.* The gut microbiome in atherosclerotic cardiovascular disease. *Nat Commun* 2017;**8**:845. doi:10.1038/s41467-017-00900-1
- 57 Lynge E, Sandegaard JL, Rebolj M. The Danish National Patient Register. *Scand J Public Health* 2011;**39**:30–3. doi:10.1177/1403494811401482
- 58 Wallach Kildemoes H, Toft Sørensen H, Hallas J. The Danish National Prescription Registry. *Scand J Public Health* 2011;**39**:38–41. doi:10.1177/1403494810394717
- 59 Sahl Andersen J, De Fine Olivarius N, Krasnik A. The Danish National Health Service Register. <https://doi.org/10.1177/1403494810394718> 2011;**39**:34–7. doi:10.1177/1403494810394718
- 60 Jørgensen ME, Kristensen JK, Husted GR, *et al.* The Danish Adult Diabetes Registry. *Clin Epidemiol* 2016;**8**:429–34. doi:10.2147/CLEP.S99518
- 61 Andersen N, Hjortdal JØ, Schielke KC, *et al.* The Danish Registry of Diabetic Retinopathy. *Clin Epidemiol* 2016;**8**:613–9. doi:10.2147/CLEP.S99507
- 62 Carstensen, Bendix and Jørgensen ME. A Danish Diabetes Register. 2019. <http://bendixcarstensen.com/DMreg/Reg2016.pdf>
- 63 Grann A.F., Erichsen R., Nielsen A.G., Frøslev T. and RTRW. Existing data sources for clinical epidemiology: The clinical laboratory information system (LABKA) research database at Aarhus University, Denmark. *Clin Epidemiol* 2011;**3**:133. doi:10.2147/clep.s17901
- 64 Andersen TF, Madsen M, Jørgensen J, *et al.* The Danish National Hospital Register. A valuable source of data for modern health sciences. *Dan Med Bull* 1999;**46**:263–8.
- 65 Risnes KR, Vatten LJ, Baker JL, *et al.* Birthweight and mortality in adulthood: a systematic review and meta-analysis. *Int J Epidemiol* 2011;**40**:647–61. doi:10.1093/IJE/DYQ267
- 66 Kajantie E, Osmond C, Barker DJP, *et al.* Size at birth as a predictor of mortality in adulthood: A follow-up of 350 000 person-years. *Int J Epidemiol* 2005;**34**:655–63. doi:10.1093/ije/dyi048

- 1  
2  
3  
4 67 Fernandez-Twinn DS, Hjort L, Novakovic B, *et al.* Intrauterine programming of obesity and  
5 type 2 diabetes. *Diabetologia* 2019 *62:10* 2019;**62**:1789–801. doi:10.1007/S00125-019-  
6 4951-9  
7  
8  
9 685 68 Wibaek R, Andersen GS, Linneberg A, *et al.* Low birthweight is associated with a higher  
10 incidence of type 2 diabetes over two decades independent of adult BMI and genetic  
11 predisposition. *Diabetologia* 2023;**1**:3. doi:10.1007/s00125-023-05937-0  
12  
13  
14  
15  
16  
17 690  
18  
19  
20  
21  
22  
23  
24  
25  
26  
27 695  
28  
29  
30  
31  
32  
33  
34  
35  
36  
37 700  
38  
39  
40  
41  
42  
43  
44  
45  
46  
47 705  
48  
49  
50  
51  
52  
53  
54  
55  
56  
57 710  
58  
59  
60

For peer review only

**Table 1.** Summary of data collected at the Inter99 baseline and the 20-year follow-up study (including extended sub-studies).

| <b>Data</b>                                      | <b>Variables</b>                                                                                                                                                                                                                                                            | <b>Baseline</b> | <b>20-year</b> |
|--------------------------------------------------|-----------------------------------------------------------------------------------------------------------------------------------------------------------------------------------------------------------------------------------------------------------------------------|-----------------|----------------|
| <b><i>Questionnaire-based information</i></b>    |                                                                                                                                                                                                                                                                             |                 |                |
| Demographics                                     | Sex, age, family, marital status, education, employment status, household income                                                                                                                                                                                            | X               | X              |
| Diseases                                         | Chronic diseases, contact to health care system, symptoms                                                                                                                                                                                                                   | X               | X              |
| Health                                           | Self-rated health, stress, sleep                                                                                                                                                                                                                                            | X               | X              |
| Lifestyle                                        | Physical activity, smoking, alcohol, diet, network                                                                                                                                                                                                                          | X               | X              |
| <b><i>Deep-phenotyping health assessment</i></b> |                                                                                                                                                                                                                                                                             |                 |                |
| Anthropometry                                    | Height, weight, waist and hip circumference                                                                                                                                                                                                                                 | X               | X              |
| Bioelectrical impedance                          | Fat and lean (muscle) body mass                                                                                                                                                                                                                                             | X               | X              |
| Blood pressure                                   | Systolic and diastolic blood pressure, resting heart rate                                                                                                                                                                                                                   | X               | X              |
| Cardiac autonomic neuropathy                     | Resting heart rate variability and cardiovascular autonomic reflex tests                                                                                                                                                                                                    |                 | X              |
| Cardiac CT                                       | Coronary atherosclerosis, cardiac chamber size, LV hypertrophy                                                                                                                                                                                                              |                 | X              |
| Continuous glucose monitoring                    | 7-day 24-hour glucose levels                                                                                                                                                                                                                                                |                 | X              |
| Dynamometer and sit-to-stand test                | Muscle strength                                                                                                                                                                                                                                                             |                 | X              |
| Electrocardiography                              | Heart rhythm and pathologies                                                                                                                                                                                                                                                |                 | X              |
| Optos scanning                                   | Ocular fundus characteristics, retinopathy                                                                                                                                                                                                                                  | X               | X              |
| Oxymeter                                         | Oxygen saturation                                                                                                                                                                                                                                                           |                 | X              |
| Pulse wave velocity                              | Arterial stiffness                                                                                                                                                                                                                                                          |                 | X              |
| Spirometry                                       | Lung function                                                                                                                                                                                                                                                               | X               | (S)            |
| Transient elastography                           | Liver stiffness and steatosis                                                                                                                                                                                                                                               |                 | X              |
| <b><i>Laboratory assessments</i></b>             |                                                                                                                                                                                                                                                                             |                 |                |
| Blood biochemistry                               | Leukocytes and differential count, electrolytes (sodium), glucose, HbA1c, lipids (total cholesterol, HDL, LDL, VLDL, triglycerides), kidney function (creatinine, eGFR), Vitamin K status (dephosphorylated-uncarboxylated matrix-gla Protein), liver function (ALAT, ASAT) | X               | X              |
| Urine biochemistry                               | Albumin, creatinine, sodium, potassium                                                                                                                                                                                                                                      | X               | X              |
| <b><i>Biobanking (-80°C)</i></b>                 |                                                                                                                                                                                                                                                                             |                 |                |
| Blood                                            | Fasting blood samples (whole-blood, serum, and plasma)                                                                                                                                                                                                                      | X               | X              |
| Urine                                            | Spot urine                                                                                                                                                                                                                                                                  | X               | X              |
|                                                  | 24-hour urine collection                                                                                                                                                                                                                                                    | X(S)            | X(S)           |
| Feces                                            | Fecal samples                                                                                                                                                                                                                                                               |                 | X(S)           |

(S) subgroup of participant

For peer review only

1  
2  
3  
4  
5  
6  
7  
8  
9  
10  
11  
12  
13  
14  
15  
16  
17  
18  
19  
20  
21  
22  
23  
24  
25  
26  
27  
28  
29  
30  
31  
32  
33  
34  
35  
36  
37  
38  
39  
40  
41  
42  
43  
44  
45  
46



Figure 1.

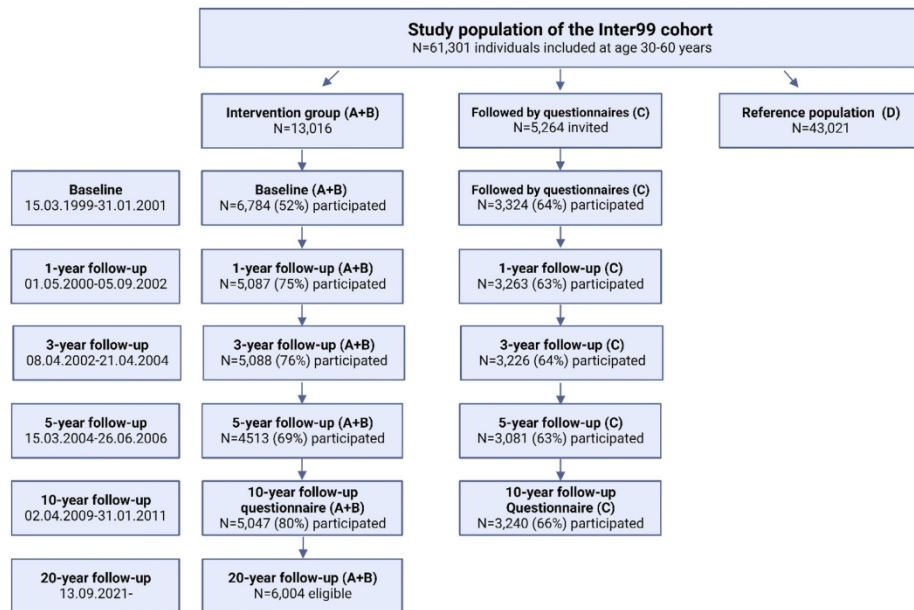

Figure 1. Flow chart of participation in the Inter99 study 1999–2023. From a study population of N=61,301 individuals, N=13,016 and N=5,264 were randomized into two intervention groups (A+B) and a group followed by questionnaires (C). The A and B intervention groups participated in health examination, questionnaires, and lifestyle interventions, while group C was followed only by questionnaires. A reference population (D) of N=43,021 individuals were followed in registries and not contacted. Participants from the intervention groups (A+B), who participated in the baseline study and were eligible in December 2019 are invited for the Inter99 20-year follow-up; N=6,004.

188x128mm (300 x 300 DPI)

Figure 2.

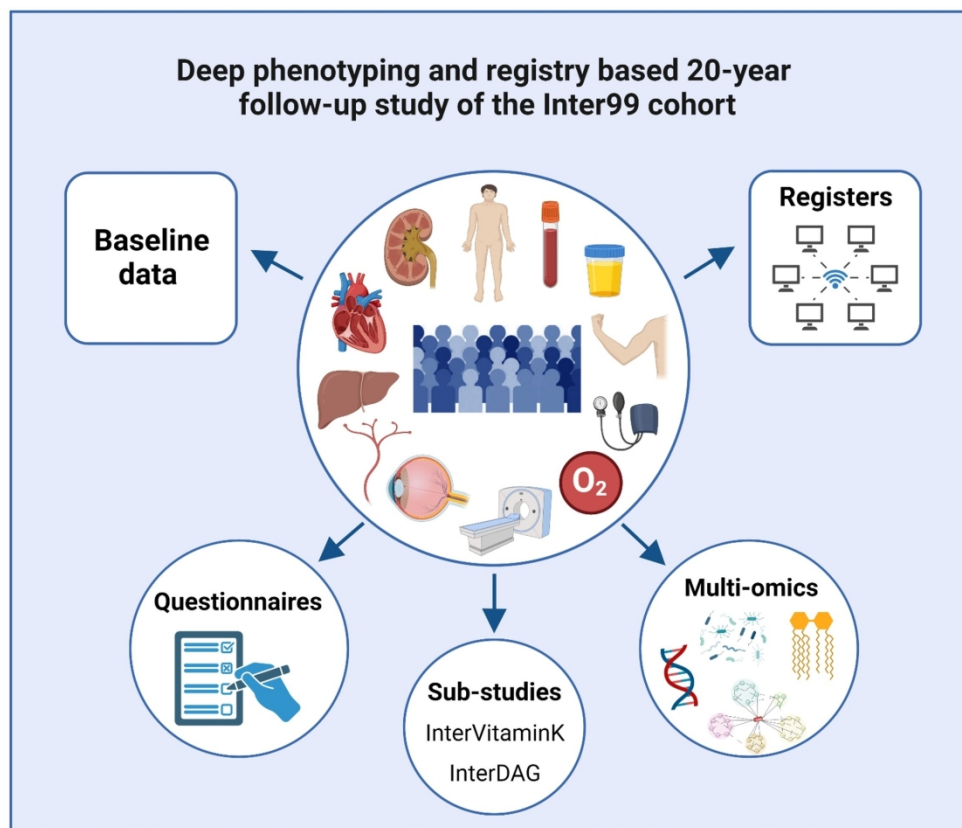

Figure 2. Overview of the 20-year deep-phenotyping follow-up clinical examinations, the possibilities of coupling to baseline and register data as well as for future and extended analyses.

183x167mm (300 x 300 DPI)

1  
2  
3  
4 **Protocol for the combined cardiometabolic deep phenotyping and registry-based twenty-year**  
5 **follow-up study of the Inter99 cohort.**  
6  
7  
8  
9

10  
11 **SUPPLEMENTAL METHODS**  
12  
13

14  
15 **Deep phenotyping follow-up study**

16 *Arterial stiffness*

17 Arterial stiffness will be assessed based on carotid-femoral Pulse Wave Velocity (cfPWV) a non-  
18 invasive measure considered the gold standard method of assessing direct arterial stiffness [1]. The  
19 SphygmoCor XCEL instrument (AtCor Medical, Sydney, Australia) will be applied to measure  
20 cfPWV. cfPWV measurements are performed under standardized conditions according to guidelines  
21 [1] and follow the quality demands suggested by the manufacturer. Prior to the measurement, the  
22 participant must be fasting for 3 hours (including the absence of coffee, tea, smoking, and alcohol)  
23 and resting in a lying position for 10 minutes in a quiet room. Blood pressure is measured three times  
24 with a Microlife BP A6 PC blood pressure device, and the mean blood pressure is used. cfPWV is  
25 defined as the distance between the two recording sites divided by the difference in pulse wave travel  
26 time and expressed in meters per second. Distance is directly measured as a straight line by a caliper  
27 from the recording sites at the carotid to the femoral artery, and the total distance is multiplied by 0.8  
28 [1]. The transit time is based on measurements of pulse waves assessed by use of an applanation  
29 tonometer at the carotid artery on the neck and from a blood pressure cuff on the thigh. cfPWV  
30 measurements will be performed twice, and if these vary by more than 0.5 m/s, a third measurement  
31 will be performed.  
32  
33  
34  
35  
36  
37  
38

39 *Biochemistry*

40 The total of cholesterol, triglyceride and high-density lipoprotein cholesterol (HDL) will be sampled  
41 in heparin tubes and centrifuged, whereby content is determined in plasma with colorimetric slide  
42 test (Vitros 4600/5600, Ortho Clinical Diagnostics, Raritan, USA). Very-low density lipoprotein  
43 cholesterol (VLDL) and low-density lipoprotein cholesterol (LDL) is calculated from  $VLDL = 0.45 \times$   
44 triglyceride;  $LDL = Total\ Cholesterol - HDL - VLDL$ . Blood samples for glucose measurements will  
45 be taken in citrate buffer-fluoride mixture (FC-Mixture) tubes and measured by HPLC. Aldosterone  
46 and renin will be sampled in EDTA tubes, centrifuged and plasma stored at  $-80^{\circ}C$ , before analysis by  
47 iSYS equipment from IDS PLC, Tyne and Wear, UK.  
48  
49  
50  
51  
52

53 *Cardiac Computed Tomography (CT) scans*

54 Cardiac CT scans will include a non-contrast CT scan to evaluate CAC score, aortic valve  
55 calcifications, lung density analysis, and bone mineral density (BMD). Furthermore, a CT  
56 angiography is applied to evaluate cardiovascular and heart structures and subclinical obstructive  
57  
58  
59  
60

1  
2  
3  
4 coronary atherosclerosis. In addition to cardiac risk assessment, the CT scan includes comprehensive  
5 imaging of lungs, vascular system, sarcopenia assessment, liver, spleen, abdominal fat, and spine.  
6

7  
8 CT imaging will be performed using a 320-multidetector scanner (Aquilion One, Canon Medical  
9 Systems). Participants are instructed to abstain from coffee, tea, cocoa, and chocolate from 4 p.m. the  
10 day before the CT scan. For participants with a heart rate of >60 bpm and no contraindications, a  
11 cardio-selective beta-blocker (metoprolol 25–150 mg) is administered orally prior to the CT scan.  
12 Intravenous contrast media (Visipaque) is given after assessment of kidney function (estimated  
13 Glomerular Filtration Rate (eGFR) >60 ml/min/1.73m<sup>2</sup>). A protocol using one rotation acquisition  
14 will be used. The total dose of radiation received from a single cardiac CT scan is approximately 3–  
15 10 mSv. For comparison, the average annual limit for radiation workers is 20 mSv and Denmark's  
16 annual background radiation dose is 3 mSv. According to the Danish National Committee on  
17 Biomedical Research Ethics, a radiation dose of 10 mSv may increase cancer risk by 0.05 % [1].  
18  
19  
20  
21

### 22 *Heart rate variability*

23 No human overreading will take place. The RR interval, QRS duration, and QT interval will be  
24 obtained. The QT interval will be corrected for heart rate using the method of Fridericia (QTcF). The  
25 ECGs will be converted to VCGs by two different transformation matrices: the Kors and the Inverse  
26 Dower matrices [2,3]. A QRS-Ta estimate will be obtained without VCG transformation by the  
27 method of Rautaharju [4].  
28  
29  
30

### 31 *Muscle Strength (hand grip and chair stand)*

32 The participant will be sitting in an upright position with the arm along the side; and the arm bent at  
33 90° with the elbow, forearm and wrist in a neutral position. The width of the handle will be adjusted  
34 to fit the hand size. Hand grip will be measured three times in the dominant hand with brief pauses  
35 between each measurement and the best three measurements considered as the maximum hand grip  
36 strength [5]. Verbal instructions will be given before performing the Sit-to-Stand test (STS) test. After  
37 the cue “ready set, go!” the participant will start to do STS repetitions as rapidly as possible from the  
38 sitting position, with arms crossed over the chest. Participant will perform the test five times, and the  
39 time needed to complete the task will be recorded with a stopwatch to the nearest 0.01 s. The subjects  
40 will be allowed to try 1-2 times with a resting period (30-60 s) before the definitive STS measure is  
41 annotated [6].  
42  
43  
44  
45  
46  
47  
48

## 49 **Extended clinical sub-studies nested within the twenty-year follow-up of the Inter99 cohort**

### 50 **1. *The InterVitaminK trial***

51 As part of the InterVitaminK trial lung function will be assessed, Hereby, longitudinal spirometry  
52 data will be available in a sub-sample of the Inter99 20-year follow-up study [7].  
53  
54  
55

### 56 *Spirometry*

1  
2  
3  
4 Pulmonary function will be measured through spirometry performed with Vyntus SPIRO (Vyaire  
5 Medical), disposable MicroGard pulmonary function filters with nose clips (V-892391) and  
6 Sentriesuite software (V3.20.3). The examinations will be performed according to the 2005 American  
7 Thoracic Society and the European Respiratory Society (ATS/ERS) spirometry standard [8] after a  
8 daily calibration with a 3-litre calibrated syringe. The spirometer calibration syringe will be calibrated  
9 yearly to comply with the international standard [9]. Body weight is measured using a digital scale  
10 (Tanita, BC 420), and 1 kg is automatically subtracted to account for the weight of the participant's  
11 clothes. Height is measured without shoes with a Holtain Harpenden Stadiometer (model: 602VR).  
12 Respiratory function measurements, i.e., expiratory forced vital capacity (FVC) and forced expiratory  
13 volume in one second (FEV1), will be conducted.  
14  
15  
16  
17  
18

## 19 **2. The InterDAG Study**

20 Participants will receive information about and be invited to participate in ten days continuous  
21 glucose monitoring (CGM) and physical activity accelerometer measurements as well as seven-day  
22 food registration, three day 24-hr urine collection and one stool collection. Participants will be  
23 instructed to follow their usual routines during the collection period.  
24  
25

### 26 *Ten-day Physical activity measurements by Sens Motion® accelerometers*

27 Physical activity and sedentary behavior will be monitored by continuous 24-hour\*10 days  
28 measurement using Sens Motion® accelerometers (www.sens.dk) skin-taped to the right thigh. It will  
29 be possible to classify behavior second-by-second into the following activity types: sitting/lying,  
30 standing, walking, running, and cycling. Raw accelerometer data will also be classified as time spent  
31 in different intensity levels, including vigorous, moderate, and light intensity activity. The Sens  
32 Motion® accelerometer collects second by second movement data from three axes (vertical,  
33 horizontal and lateral), and is small, (45 x 4.5 x 23 mm) lightweight 7g) and waterproof with a  
34 sampling acceleration at 12 Hz and a range of  $\pm 4G$ . The Sens Motion patch will be attached to the  
35 thigh using hypo-allergenic dressing at the CCRP. After wearing the accelerometer for 24-hours\*10  
36 days, participants will return the accelerometer to the CCRP and collected data will be automatically  
37 transmitted to secure Cloud storage via the smartphone app. During the 10 days of wearing the Sens  
38 Motion® accelerometer, participants will be asked to keep a log on daily work and sleep times.  
39  
40  
41  
42  
43  
44

### 45 *Seven-day food record*

46 At the end of each day, participants will register food and drink intake, applying the online dietary  
47 assessment software myfood24®. It is structured according to a typical meal pattern covering  
48 breakfast, lunch, dinner and snacks plus drinks. The participants will be able to search for items and  
49 estimate the consumed amount by selecting the closest portion size using portion size pictures,  
50 provided weights, or entering an exact amount. Internal prompts for frequently forgotten items like  
51 condiments, snacks, confectionary, and beverages are included. And there is also a recipe builder  
52 feature. Furthermore, there is the option for participants to report intake of nutritional supplements  
53 and if the day represented a usual or unusual intake, including reasons for unusual intakes such as  
54 illness or special occasions. To assist recordings, participants will be given a 7-day food diary to  
55  
56  
57  
58  
59  
60

1  
2  
3  
4 record food intake. If the needed computer skills are lacking, the paper food diary will be recorded  
5 by the staff.  
6  
7

### 8 *Three-day 24 hr urine sample*

9 The urine collection will be carried out simultaneous with the 7-day food record. Participants will  
10 receive a brown bottle (3 L), and a smaller 'visiting bottle' (0.5 L), a large bottle and urine monovettes  
11 (Sarstedt, Nümbrecht-Rommelsdorf, Germany) for collection of urine aliquots after the completion  
12 of each 24 h collection period. A pen to mark containers and monovettes with name, day, and volume.  
13 For validation participants will also receive 3 times 3 80 mg para-aminobenzoic acid (PABA) tablets  
14 (Glostrup Hospital Pharmacy). A sheet to register beginning and ending of the collection periods,  
15 PABA administration and exceptions to the protocol (i.e., estimation of urine loss, medicine).  
16 Participants will be informed to collect 24 h urine for three consecutive days (1 weekend day, 2  
17 working days). All participants will receive verbal and printed instructions (including a video link)  
18 on how to collect 24 h urine: All urine must be collected during a 24 h period starting from the second  
19 urine sample on the morning of the collection day and ending with the first urine sample from the  
20 following morning. The morning, after completion of the 24 h urine collection participants must mark  
21 the volume and day of the collection on the container and registered values in the data sheet. Also,  
22 the time of start and finish of the urine collections, and the time of taking the PABA tablets will be  
23 recorded together with deviations to the instructions. After volume recording, the urine in the  
24 container will be mixed before taking out aliquots. Hereafter monovettes will be frozen at home -20  
25 °C until returned to CCRP. Containers will be rinsed with water and participants can resume their  
26 next 24 h urine collection.  
27  
28  
29  
30  
31  
32  
33

34 A well-trained health worker will check the readings of the total volume marked on the containers  
35 and urine aliquots will stored at -80 °C before being transported to a certified laboratory for analysis  
36 of sodium, potassium, albumin, creatinine and for PABA analyses. Based on the participants daily  
37 recordings of diuresis the 24 h-values of sodium, potassium, albumin and creatinine will be  
38 determined. PABA is an accepted objective marker to verify completeness of 24 h urine sampling in  
39 adults [10]. The underlying assumption is that PABA is excreted almost quantitatively in 24 h. On  
40 collection days adults ingested 240 mg of PABA, divided into three doses of 80 mg (one with each  
41 main meal). According to the HPLC method applied a PABA recovery in the urine above 77.9% of  
42 total ingested dose indicates urine has been collected for 24 h [11]. However, PABA recovery levels  
43 above 105% will be regarded as mistaken. If PABA recovery is not available urine collections with  
44 collection time less than 22.5 h or more than 25.5 h will be excluded as well as urine collections with  
45 volume <500 mL/24 h for adults [11].  
46  
47  
48  
49  
50

### 51 *Fecal sample*

52 Stool samples will be collected at home by the participants in a 5 mL tube, and directly put in minus  
53 20 freezers. Samples are transported from home to the lab in an insulated bag and stored in a minus  
54 80 freezers. At site the stool samples are aliquoted by the MGISTP-7000 robot to a 96well format.  
55 The DNA extraction itself takes place in MGISTP-960well robot, using the MGIEasy Stool  
56 Microbiome DNA extraction kit and its buffers (Cat.no 940-000122-00, MGI). Sequencing is done  
57  
58  
59  
60

1  
2  
3  
4 in the DNBSEQ-G400 from MGI using HotMPS High-throughput Sequencing Set (Cat.no 940-  
5 000091-00, MGI) for library preparations with a depth of 10GB/sample. Protocols written by the  
6 manufacture will be followed.  
7  
8  
9

### 10 **Deviations between examinations at baseline and twenty-year follow-up of the Inter99 cohort**

- 11 • Participants were fasting from 11 pm the night before baseline examinations compared to a  
12 minimum of six hours before examinations at follow-up.
- 13 • Blood was drawn from a peripheral venous catheter as well as a capillary sample taken from  
14 the finger or earlobe at baseline examinations as opposed to vacuettes used for blood sampling  
15 at follow-up.
- 16 • Spot urine samples were collected throughout the day, as compared to morning spot urine  
17 collection at follow-up.
- 18 • Blood pressure was measured by a mercury manometer at baseline and by an electronic blood  
19 pressure monitor at follow-up. At baseline the third measurement was only performed if blood  
20 pressure was above 140 systolic or 90 diastolic. At follow-up blood pressure is measured three  
21 times one minute apart.
- 22 • Ophthalmic examination a baseline included a 7-field non-stereoscopic 60-degree digital  
23 fundus photography (TRC-50X camera; Topcon, Tokyo, Japan) [12] and a follow-up ocular  
24 wide-field fundus photography and optical coherence tomography (OCT) are made using the  
25 Optos Monaco device (Optos PLC, Dunfermline, UK) [13].
- 26 • Deep phenotyping examinations introduced at twenty-year follow-up study were:
  - 27 - Arterial stiffness
  - 28 - Body composition
  - 29 - Cardiac autonomic neuropathy
  - 30 - Coronary artery calcification
  - 31 - Fundus characteristics
  - 32 - Heart rhythm
  - 33 - Liver stiffness and steatosis
  - 34 - Muscle strength
  - 35 - Oxygen saturation

## References

- 1 Van Bortel LM, Laurent S, Boutouyrie P, *et al.* Expert consensus document on the measurement of aortic stiffness in daily practice using carotid-femoral pulse wave velocity. In: *Journal of Hypertension*. Lippincott Williams and Wilkins 2012. 445–8. doi:10.1097/HJH.0b013e32834fa8b0
- 2 Kors JA, Van Herpen G, Sittig AC, *et al.* Reconstruction of the Frank vectorcardiogram from standard electrocardiographic leads: diagnostic comparison of different methods. *Eur Heart J* 1990;**11**:1083–92. doi:10.1093/oxfordjournals.eurheartj.a059647
- 3 Edenbrandt L, Pahlm O. Vectorcardiogram synthesized from a 12-lead ECG: Superiority of the inverse Dower matrix. *J Electrocardiol* 1988;**21**:361–7. doi:10.1016/0022-0736(88)90113-6
- 4 Rautaharju PM, Prineas RJ, Zhang Z-M. A simple procedure for estimation of the spatial QRS/T angle from the standard 12-lead electrocardiogram. *J Electrocardiol* 2007;**40**:300–4. doi:10.1016/j.jelectrocard.2006.11.003
- 5 Aadahl M, Beyer N, Linneberg A, *et al.* Grip strength and lower limb extension power in 19-72-year-old Danish men and women: the Health2006 study. *BMJ Open* 2011;**1**:e000192–e000192. doi:10.1136/bmjopen-2011-000192
- 6 Alcazar J, Losa-Reyna J, Rodriguez-Lopez C, *et al.* The sit-to-stand muscle power test: An easy, inexpensive and portable procedure to assess muscle power in older people. *Exp Gerontol* 2018;**112**:38–43. doi:10.1016/j.exger.2018.08.006
- 7 Kampmann FB, Thyssen SM, Nielsen CFB, *et al.* Study protocol of the InterVitaminK trial: a Danish population-based randomised double-blinded placebo-controlled trial of the effects of vitamin K (menaquinone-7) supplementation on cardiovascular, metabolic and bone health. *BMJ Open* 2023;**13**:e071885. doi:10.1136/bmjopen-2023-071885
- 8 Miller MR. Standardisation of spirometry. *Eur Respir J* 2005;**26**:319–38. doi:10.1183/09031936.05.00034805
- 9 Madsen F. Validation of spirometer calibration syringes. *Scand J Clin Lab Invest* 2012;**72**:608–13. doi:10.3109/00365513.2012.723739
- 10 Cox L, Guberg K, Young S, *et al.* Validation of the use of p-aminobenzoic acid to determine completeness of 24 h urine collections in surveys of diet and nutrition. *Eur J Clin Nutr* 2018;**72**:1180. doi:10.1038/S41430-018-0195-X
- 11 Jakobsen J, Ovesen L, Fagt S, *et al.* Para-aminobenzoic acid used as a marker for completeness of 24 hour urine: assessment of control limits for a specific HPLC method. *Eur J Clin Nutr* 1997;**51**:514–9. doi:10.1038/SJ.EJCN.1600434
- 12 Munch IC, Kessel L, Borch-Johnsen K, *et al.* Microvascular retinopathy in subjects without diabetes: the Inter99 Eye Study. *Acta Ophthalmol* 2012;**90**:613–9. doi:10.1111/j.1755-



3768.2011.2148.x

- 13 Byberg S, Vistisen D, Diaz L, *et al.* Optos wide-field imaging versus conventional camera imaging in Danish patients with type 2 diabetes. *Acta Ophthalmol* 2019;**97**:815–20. doi:10.1111/aos.14118

For peer review only

**STROBE 2007 (v4) Statement—Checklist of items that should be included in reports of *cohort studies***

| Section/Topic                | Item # | Recommendation                                                                                                                                                                       | Reported on page # |
|------------------------------|--------|--------------------------------------------------------------------------------------------------------------------------------------------------------------------------------------|--------------------|
| <b>Title and abstract</b>    | 1      | (a) Indicate the study's design with a commonly used term in the title or the abstract                                                                                               | 1                  |
|                              |        | (b) Provide in the abstract an informative and balanced summary of what was done and what was found                                                                                  | 2                  |
| <b>Introduction</b>          |        |                                                                                                                                                                                      |                    |
| Background/rationale         | 2      | Explain the scientific background and rationale for the investigation being reported                                                                                                 | 5-6                |
| Objectives                   | 3      | State specific objectives, including any prespecified hypotheses                                                                                                                     | 5-6                |
| <b>Methods</b>               |        |                                                                                                                                                                                      |                    |
| Study design                 | 4      | Present key elements of study design early in the paper                                                                                                                              | 5-7                |
| Setting                      | 5      | Describe the setting, locations, and relevant dates, including periods of recruitment, exposure, follow-up, and data collection                                                      | 6-7                |
| Participants                 | 6      | (a) Give the eligibility criteria, and the sources and methods of selection of participants. Describe methods of follow-up                                                           | 6-7                |
|                              |        | (b) For matched studies, give matching criteria and number of exposed and unexposed                                                                                                  | -                  |
| Variables                    | 7      | Clearly define all outcomes, exposures, predictors, potential confounders, and effect modifiers. Give diagnostic criteria, if applicable                                             | 7-9                |
| Data sources/<br>measurement | 8*     | For each variable of interest, give sources of data and details of methods of assessment (measurement). Describe comparability of assessment methods if there is more than one group | 7-9                |
| Bias                         | 9      | Describe any efforts to address potential sources of bias                                                                                                                            | 5                  |
| Study size                   | 10     | Explain how the study size was arrived at                                                                                                                                            | 7                  |
| Quantitative variables       | 11     | Explain how quantitative variables were handled in the analyses. If applicable, describe which groupings were chosen and why                                                         | 10-11              |
| Statistical methods          | 12     | (a) Describe all statistical methods, including those used to control for confounding                                                                                                | 10-11              |
|                              |        | (b) Describe any methods used to examine subgroups and interactions                                                                                                                  | 10-11              |
|                              |        | (c) Explain how missing data were addressed                                                                                                                                          | 10                 |
|                              |        | (d) If applicable, explain how loss to follow-up was addressed                                                                                                                       | 10                 |
|                              |        | (e) Describe any sensitivity analyses                                                                                                                                                | -                  |
| <b>Results</b>               |        |                                                                                                                                                                                      |                    |

|                          |     |                                                                                                                                                                                                                                                                                                                                                                                                               |                   |
|--------------------------|-----|---------------------------------------------------------------------------------------------------------------------------------------------------------------------------------------------------------------------------------------------------------------------------------------------------------------------------------------------------------------------------------------------------------------|-------------------|
| Participants             | 13* | (a) Report numbers of individuals at each stage of study—eg numbers potentially eligible, examined for eligibility, confirmed eligible, included in the study, completing follow-up, and analysed<br>(b) Give reasons for non-participation at each stage<br>(c) Consider use of a flow diagram                                                                                                               | 6-7<br>n/a<br>n/a |
| Descriptive data         | 14* | (a) Give characteristics of study participants (eg demographic, clinical, social) and information on exposures and potential confounders<br>(b) Indicate number of participants with missing data for each variable of interest<br>(c) Summarise follow-up time (eg, average and total amount)                                                                                                                | -<br>-<br>7       |
| Outcome data             | 15* | Report numbers of outcome events or summary measures over time                                                                                                                                                                                                                                                                                                                                                | -                 |
| Main results             | 16  | (a) Give unadjusted estimates and, if applicable, confounder-adjusted estimates and their precision (eg, 95% confidence interval). Make clear which confounders were adjusted for and why they were included<br>(b) Report category boundaries when continuous variables were categorized<br>(c) If relevant, consider translating estimates of relative risk into absolute risk for a meaningful time period | -<br>-<br>-       |
| Other analyses           | 17  | Report other analyses done—eg analyses of subgroups and interactions, and sensitivity analyses                                                                                                                                                                                                                                                                                                                | -                 |
| <b>Discussion</b>        |     |                                                                                                                                                                                                                                                                                                                                                                                                               |                   |
| Key results              | 18  | Summarise key results with reference to study objectives                                                                                                                                                                                                                                                                                                                                                      | -                 |
| <b>Limitations</b>       |     |                                                                                                                                                                                                                                                                                                                                                                                                               |                   |
| Interpretation           | 20  | Give a cautious overall interpretation of results considering objectives, limitations, multiplicity of analyses, results from similar studies, and other relevant evidence                                                                                                                                                                                                                                    | -                 |
| Generalisability         | 21  | Discuss the generalisability (external validity) of the study results                                                                                                                                                                                                                                                                                                                                         | -                 |
| <b>Other information</b> |     |                                                                                                                                                                                                                                                                                                                                                                                                               |                   |
| Funding                  | 22  | Give the source of funding and the role of the funders for the present study and, if applicable, for the original study on which the present article is based                                                                                                                                                                                                                                                 | 14                |

\*Give information separately for cases and controls in case-control studies and, if applicable, for exposed and unexposed groups in cohort and cross-sectional studies.

**Note:** An Explanation and Elaboration article discusses each checklist item and gives methodological background and published examples of transparent reporting. The STROBE checklist is best used in conjunction with this article (freely available on the Web sites of PLoS Medicine at <http://www.plosmedicine.org/>, Annals of Internal Medicine at <http://www.annals.org/>, and Epidemiology at <http://www.epidem.com/>). Information on the STROBE Initiative is available at [www.strobe-statement.org](http://www.strobe-statement.org).

# BMJ Open

## Protocol for the combined cardiometabolic deep phenotyping and registry-based twenty-year follow-up study of the Inter99 cohort

|                               |                                                                                                                                                                                                                                                                                                                                                                                                                                                                                                                                                                                                                                                                                                                                                                                                                                                                                                                                                                                                                                                                                                                                                                                                                                                                                                                                                                                                                                                                                                                                                                                                                                                                                                                                                                                                                                                                                                                                                                                                                                                                                                                                                                                   |
|-------------------------------|-----------------------------------------------------------------------------------------------------------------------------------------------------------------------------------------------------------------------------------------------------------------------------------------------------------------------------------------------------------------------------------------------------------------------------------------------------------------------------------------------------------------------------------------------------------------------------------------------------------------------------------------------------------------------------------------------------------------------------------------------------------------------------------------------------------------------------------------------------------------------------------------------------------------------------------------------------------------------------------------------------------------------------------------------------------------------------------------------------------------------------------------------------------------------------------------------------------------------------------------------------------------------------------------------------------------------------------------------------------------------------------------------------------------------------------------------------------------------------------------------------------------------------------------------------------------------------------------------------------------------------------------------------------------------------------------------------------------------------------------------------------------------------------------------------------------------------------------------------------------------------------------------------------------------------------------------------------------------------------------------------------------------------------------------------------------------------------------------------------------------------------------------------------------------------------|
| Journal:                      | <i>BMJ Open</i>                                                                                                                                                                                                                                                                                                                                                                                                                                                                                                                                                                                                                                                                                                                                                                                                                                                                                                                                                                                                                                                                                                                                                                                                                                                                                                                                                                                                                                                                                                                                                                                                                                                                                                                                                                                                                                                                                                                                                                                                                                                                                                                                                                   |
| Manuscript ID                 | bmjopen-2023-078501.R1                                                                                                                                                                                                                                                                                                                                                                                                                                                                                                                                                                                                                                                                                                                                                                                                                                                                                                                                                                                                                                                                                                                                                                                                                                                                                                                                                                                                                                                                                                                                                                                                                                                                                                                                                                                                                                                                                                                                                                                                                                                                                                                                                            |
| Article Type:                 | Protocol                                                                                                                                                                                                                                                                                                                                                                                                                                                                                                                                                                                                                                                                                                                                                                                                                                                                                                                                                                                                                                                                                                                                                                                                                                                                                                                                                                                                                                                                                                                                                                                                                                                                                                                                                                                                                                                                                                                                                                                                                                                                                                                                                                          |
| Date Submitted by the Author: | 14-Dec-2023                                                                                                                                                                                                                                                                                                                                                                                                                                                                                                                                                                                                                                                                                                                                                                                                                                                                                                                                                                                                                                                                                                                                                                                                                                                                                                                                                                                                                                                                                                                                                                                                                                                                                                                                                                                                                                                                                                                                                                                                                                                                                                                                                                       |
| Complete List of Authors:     | <p>Bjørnsbo, Kirsten; Frederiksberg Hospital Center for Klinisk Forskning og Forebyggelse<br/> Brøns, Charlotte; Steno Diabetes Center Copenhagen,<br/> Aadahl, Mette; Frederiksberg Hospital Center for Klinisk Forskning og Forebyggelse<br/> Kampmann, Freja; Frederiksberg Hospital Center for Klinisk Forskning og Forebyggelse<br/> Friis Bryde Nielsen , Camilla; Frederiksberg Hospital Center for Klinisk Forskning og Forebyggelse<br/> Lundbergh, Bjørn; Frederiksberg Hospital Center for Klinisk Forskning og Forebyggelse<br/> Christensen, Rasmus; Steno Diabetes Center Copenhagen<br/> Kårhus, Line Lund; Frederiksberg Hospital Center for Klinisk Forskning og Forebyggelse, Section of Epidemiology<br/> Madsen, Anja; Frederiksberg Hospital Center for Klinisk Forskning og Forebyggelse<br/> Hansen, CS; Steno Diabetes Center Copenhagen<br/> Nørgaard, Kirsten; Steno Diabetes Center Copenhagen<br/> Jørgensen, Niklas; Rigshospitalet, Clinical biochemistry<br/> Suetta, Charlotte; University of Copenhagen, Copenhagen University Hospital, Bispebjerg and Frederiksberg<br/> Kjaer, Michael; University of Copenhagen, Department of Clinical Medicine,<br/> Grarup, Niels ; University of Copenhagen Faculty of Health and Medical Sciences, Novo Nordisk Foundation Center for Basic Metabolic Research<br/> Kanters, Jørgen; University of Copenhagen Novo Nordisk Foundation Center for Basic Metabolic Research<br/> Larsen, Michael; University of Copenhagen,<br/> Køber, Lars; Rigshospitalet, Department of Cardiology<br/> Kofoed, KF; University of Copenhagen, Cardiology, section 2014<br/> Loos, Ruth; University of Copenhagen Novo Nordisk Foundation Center for Basic Metabolic Research, Copenhagen University Hospital, Bispebjerg and Frederiksberg<br/> Hansen, Torben; University of Copenhagen Novo Nordisk Foundation Center for Basic Metabolic Research, Center for Basic Metabolic Research, Section of Metabolic Genetics<br/> linneberg, allan; Frederiksberg Hospital Center for Klinisk Forskning og Forebyggelse, Research Centre for Prevention and Health<br/> Vaag, Allan; Steno Diabetes Center Copenhagen</p> |

1  
2  
3  
4  
5  
6  
7  
8  
9  
10  
11  
12  
13  
14  
15  
16  
17  
18  
19  
20  
21  
22  
23  
24  
25  
26  
27  
28  
29  
30  
31  
32  
33  
34  
35  
36  
37  
38  
39  
40  
41  
42  
43  
44  
45  
46  
47  
48  
49  
50  
51  
52  
53  
54  
55  
56  
57  
58  
59  
60

|                                    |                                                                                                 |
|------------------------------------|-------------------------------------------------------------------------------------------------|
| <b>Primary Subject Heading</b> :   | Diabetes and endocrinology                                                                      |
| <b>Secondary Subject Heading</b> : | Epidemiology, Cardiovascular medicine, Genetics and genomics, Nutrition and metabolism          |
| <b>Keywords</b> :                  | DIABETES & ENDOCRINOLOGY, CARDIOLOGY, GENETICS, NUTRITION & DIETETICS, EPIDEMIOLOGY, REGISTRIES |
|                                    |                                                                                                 |

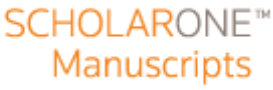

1  
2  
3  
4 **Protocol for the combined cardiometabolic deep phenotyping and registry-based twenty-year**  
5 **follow-up study of the Inter99 cohort**  
6  
7  
8

9 Kirsten Bjørnsbo<sup>1\*</sup>, Charlotte Brøns<sup>2\*</sup>, Mette Aadahl<sup>1</sup>, Freja Bach Kampmann<sup>1</sup>, Camilla Friis Bryde  
10 5 Nielsen<sup>1</sup>, Bjørn Lundbergh<sup>1</sup>, Rasmus Wibaek<sup>2</sup>, Line Kårhus<sup>1</sup>, Anja Lykke Madsen<sup>1</sup>, Christian Stevns  
11 Hansen<sup>2</sup>, Kirsten Nørgaard<sup>2,3</sup>, Niklas Rye Jørgensen<sup>4</sup>, Charlotte Suetta<sup>5</sup>, Michael Kjær<sup>5</sup>, Niels  
12 Grarup<sup>6</sup>, Jørgen K. Kanters<sup>4,7</sup>, Michael Larsen<sup>3,8</sup>, Lars Køber<sup>9</sup>, Klaus F. Kofoed<sup>3,9</sup>, Ruth J.F. Loos<sup>6</sup>,  
13 Torben Hansen<sup>6</sup>, Allan Linneberg<sup>1,3\*\*</sup>, Allan Vaag<sup>2,10,11\*\*</sup>  
14  
15  
16  
17  
18

19 10 \*Contributed equally to this work

20  
21 \*\*Shared last authorship  
22  
23  
24

25 <sup>1</sup> Center for Clinical Research and Prevention, Copenhagen University Hospital – Bispebjerg and  
26 Frederiksberg, Copenhagen, Denmark

27 15 <sup>2</sup> Steno Diabetes Center Copenhagen, Herlev, Denmark

28 <sup>3</sup> Department of Clinical Medicine, Faculty of Health and Medical Sciences, University of  
29 Copenhagen, Denmark

30 <sup>4</sup> Department of Clinical Biochemistry, Copenhagen University Hospital – Rigshospitalet,  
31 Copenhagen, Denmark

32 20 <sup>5</sup> Institute of Sports Medicine, Dept of Orthopedic Surgery and Department of Geriatrics and  
33 Palliative Medicine, Copenhagen University Hospital – Bispebjerg and Frederiksberg, Copenhagen,  
34 Denmark  
35  
36  
37

38 <sup>6</sup> Novo Nordisk Foundation Center for Basic Metabolic Research, Faculty of Health and Medical  
39 Sciences, University of Copenhagen, Copenhagen, Denmark

40 25 <sup>7</sup> Center of Physiological Research, University of California San Francisco, San Francisco, CA, USA

41 <sup>8</sup> Department of Ophthalmology, Copenhagen University Hospital – Rigshospitalet, Glostrup,  
42 Denmark  
43  
44

45 <sup>9</sup> Department of Cardiology and Radiology, Copenhagen University Hospital – Rigshospitalet,  
46 Copenhagen, Denmark

47 30 <sup>10</sup> Lund University Diabetes Centre, Malmö, Sweden

48 <sup>11</sup>Dept. of Endocrinology, Skåne University Hospital, Malmö, Sweden.  
49  
50

51 Corresponding authors: Kirsten Bjørnsbo [kirsten.bjoernsbo@regionh.dk](mailto:kirsten.bjoernsbo@regionh.dk) and Charlotte Brøns  
52 [charlotte.broens.01@regionh.dk](mailto:charlotte.broens.01@regionh.dk)  
53  
54

55 35  
56 Words: 4390

57  
58 Tables/Figures:1/2  
59  
60

## Abstract

**Introduction** The population-based Inter99 cohort has contributed extensively to our understanding of effects of a systematic screening and lifestyle intervention, as well as the multifactorial etiology of type 2 diabetes (T2D) and cardiovascular disease (CVD). To understand causes, trajectories, and patterns of early and overt cardiometabolic disease manifestations, we will perform a combined clinical deep phenotyping and registry follow-up study of the now 50-80 years old Inter99 participants.

**Methods and analysis** The Inter99 cohort comprise individuals aged 30-60 years, who lived in a representative geographical area of greater Copenhagen, Denmark, in 1999. Age- and sex-stratified random subgroups were invited to participate in either a lifestyle intervention (N=13,016) or paper surveys (N=5,264), while the rest served as a reference population (N=43,021). Of the 13,016 individuals assigned to the lifestyle intervention group, 6,784 (52%) accepted participation in a baseline health examination in 1999, including screening for cardiovascular risk factors and prediabetic conditions. In total, 6,004 eligible participants who participated in the baseline examination, will be invited to participate in the deep phenotyping 20-year follow-up clinical examination including measurements of anthropometry, blood pressure, arterial stiffness, cardiometabolic biomarkers, coronary artery calcification, heart rate variability, heart rhythm, liver stiffness, fundus characteristics, muscle strength and mass, as well as health and lifestyle questionnaires. In a subsample, 10-day monitoring of diet, physical activity and continuous glucose measurements will be performed. Fasting blood, urine, and fecal samples to be stored in a biobank. The established database will form the basis of multiple analyses. A main purpose is to investigate whether low birthweight independent of genetics, lifestyle and glucose tolerance predicts later common T2D cardiometabolic co-morbidities.

**Ethics and dissemination** The study was approved by the Medical Ethics Committee, Capital Region, Denmark (H-20076231) and by the Danish Data Protection Agency through the Capital Region of Denmark's registration system (P-2020-1074). Informed consent will be obtained before examinations. Findings will be disseminated in peer-reviewed journals, at conferences, and via presentations to stakeholders, including patients and public health policymakers.

**Study registration:** ClinicalTrials.gov, NCT05166447.

## Strengths and limitations of this study

- 75 • The longitudinal design will enable us to follow the course of both early and overt cardiometabolic disease manifestations during the period of life with highest incidence rates.
- 80 • We will be able to quantify the extent to which the type 2 diabetes (T2D)-associated comorbidities coronary arteriosclerosis, cardiac autonomic neuropathy, non-alcoholic fatty liver disease, retinopathy, and diabetic kidney disease are present among elderly people without T2D, and with known normal glucose tolerance for two decades.
- 85 • The availability of genome-wide genetic variation data, birthweight, as well as adiposity trajectories, dietary data, biomarkers of micronutrient status, and physical activity information, will provide insights into how these predisposing factors influence distinct organ morbidities and disease manifestations.
- 90 • Collection of biospecimens for micronutrient and multi-omics purposes such as genomics, transcriptomics, proteomics, metabolomics, lipidomics, and epigenomics will allow additional layers of deep phenotype analyses, including studying disease-associated genetic variants and their phenotypes.
- 95 • The fact that all individuals participated in a screening for cardiovascular disease risk and, if at risk, invited for a personalized lifestyle intervention from 1999 and for up to five years thereafter, may limit the generalizability of our findings.



## INTRODUCTION

Type 2 diabetes (T2D), cardiovascular disease (CVD) and their co-morbidities are leading causes of premature mortality and morbidity, affecting nearly one billion individuals worldwide [1,2]. T2D is arbitrarily defined by elevations of plasma glucose levels, and the current T2D diagnostic criteria does not capture the diversity of T2D sub-phenotypes characterized by differential manifestations of micro - and macrovascular complications, as well as other common comorbidities [3,4].

The overlap and heterogeneity of age-related T2D, CVD and associated comorbidities are likely rooted in the relative or predominant contributions from the triad of genetic susceptibility versus pre- and postnatal non-genetic etiologies (**Box 1**).

**Box 1.** The complex multifactorial pre- and postnatal etiology of cardiometabolic diseases

### *Constitutional primary predisposing factors*

- Genetic susceptibility
- Intrauterine environment (low or high birth weight, prematurity)

### *Acquired postnatal secondary precipitating factors*

- Sedentary lifestyle / inactivity
- Unhealthy diet / micronutrient deficiencies
- Obesity
- Smoking
- Medication
- Comorbidities
- Aging

As for genetics, the known 568 T2D susceptibility loci are estimated to explain 18% of the putative genetic contribution to T2D [5,6]. Early life developmental programming, low birth weight (LBW), as well as salt-sensitive hypertension, non-alcoholic fatty acid disease (NAFLD), dyslipidemia, and neurocognitive dysfunctions, are well-established risk factors of T2D and CVD [7–12]. Recent data even suggest that LBW, in a non-genetic manner, is associated with a more severe clinical T2D presentation and course, including earlier onset and more comorbidities at the time of diagnosis [13]. Accordingly, there is an increasing need to understand whether differential combinations of T2D etiologies influence not only T2D and CVD risk *per se*, but also the timing and patterns of clinical presentation including both early and late disease manifestations, as well as co-morbidities. As an example of unprioritized co-morbidities, T2D patients have a two-three-fold increased risk of sarcopenia [14,15]. Sarcopenia describes the age-related loss of muscle mass and strength that leads to impaired function including increased risk of falls and an overall decreased quality of life. Sarcopenia is accelerated by physical inactivity, low protein intake, and general health status and disease, and has also been associated with LBW [16].

Excess dietary sodium ( $\text{Na}^+$ ) may account for three million deaths annually [17], and reducing salt intake is among the most cost-effective CVD prevention strategies [18]. Low dietary potassium ( $\text{K}^+$ ) intake is also gaining attention as a CVD risk factor, and the urinary  $\text{Na}^+/\text{K}^+$ -ratio may therefore represent a superior cardiovascular risk measure [19–23]. As for macronutrient intake, high dietary

1  
2  
3  
4  
5  
6  
7 140  
8  
9  
10  
11  
12  
13  
14 145  
15  
16  
17  
18  
19  
20 150  
21  
22  
23  
24  
25  
26  
27 155  
28  
29  
30  
31  
32  
33 160  
34  
35  
36  
37  
38  
39  
40 165  
41  
42  
43  
44  
45  
46  
47 170  
48  
49  
50  
51  
52  
53 175  
54  
55  
56  
57  
58  
59  
60

sugar and saturated fat contents is strongly associated with T2D and CVD risk. While the Mediterranean diet may prevent CVD [24], there is nevertheless substantial gaps in our current knowledge of what defines a healthy diet with respect to not only macro but also micro nutritional composition(s) including vitamins. For instance, beyond effects on blood clotting factors, vitamin K may be important for cardiometabolic as well as bone health [25].

The Inter99 cohort provides a unique research platform to delineate the differential and overlapping roles of genetics versus the fetal environmental, as well as various postnatal lifestyle factors, for the development of early and overt cardiometabolic disease manifestations and associated co-morbidities [26–28]. We aim to perform a combined deep phenotyping and registry-based follow-up study of the Inter99 cohort, 20 years after the baseline health examinations, when participants were on average 46 years of age. While overt disease diagnoses will be captured by Danish national registries, our deep phenotyping clinical examinations allow detection of a wider range of early disease manifestations, such as vascular stiffness, liver fibrosis, retinopathy, diabetic kidney disease, and prediabetes, and the extent to which these may be present prior to the participants complying with official cardiometabolic disease diagnoses.

## METHODS AND ANALYSIS

---

### *Study setting and previous findings*

The Inter99 study was initiated in March 1999 as a population-based multi-factorial intervention study, originally designed to prevent ischemic heart disease (IHD) [29]. It comprised all individuals born in 1939-40, 1944-45, 1949-50, 1954-55, 1959-60, 1964-65, and 1969-70 (30, 35, 40, 45, 50, 55, and 60 years of age) living in 11 municipalities in Greater Copenhagen (N=61,301). The population was randomized with different age and sex ratios to two lifestyle intervention groups (A+B; N=13,016) or a group followed by questionnaires (C; N=5,264), the remaining individuals were considered as a reference population and not contacted (D; N=43,021) (**Figure 1**). Participants received individualized lifestyle counseling based on lifestyle and CVD risk score [30]. In total, 6,784 participants from the intervention groups participated in the baseline health examination (52% acceptance rate) [29]. The 5-year clinical follow-up examination, including glucose tolerance status, had a participation rate of 69% [31]. The 10-year follow-up was based on registry data and a follow-up questionnaire was sent to all eligible participants with completed baseline health examination (A+B) and to all in the paper survey group (C) (**Figure 1**) [32].

The 5-year follow-up examination showed a progression rate to overt T2D of 2.1 per 100 person-years [33], strongly supported by a substantially higher T2D prevalence after 20 years of follow-up with 6.5% of men and 3.8% in women having been diagnosed with T2D. Indeed, this will also be the case for all other T2D-associated vascular and cardiometabolic co-morbidities, underscoring the relevance of performing a combined registry-based and cardiometabolic deep phenotyping study among Inter99 participants, who are now 50-80 years old.

Original midwife records were collected from 4,744 participants in the intervention groups [34,35], and despite the relatively low average age of 46 years in 1999, we confirmed a strong inverse relationship between birthweight and risk of T2D in this Danish population [35]. The Inter99 cohort has been extensively genotyped contributing to the identification of more than 568 T2D susceptibility loci [5], and to the interactions between birthweight and genetic risk of T2D [27,28,36]. The

1  
2  
3  
4 180 prevalence of T2D associated retinopathy in the Inter99 cohort was studied in a subgroup of 970  
5 participants. Interestingly, retinopathy was present in 7.5% of the 490 subjects with completely  
6 normal glucose tolerance, supporting the notion that factors other than elevated glucose contributes  
7 to the risk of retinopathy of a type that cannot be distinguished from milder degrees of diabetic  
8 retinopathy [37].  
9

10  
11 185 The 10-year follow-up study concluded that a community-based, individually tailored intervention  
12 program with screening for risk of ischemic heart disease and repeated lifestyle intervention over 5  
13 years, had no effect on ischemic heart disease, stroke, or mortality at the population level as assessed  
14 after 10 years [38]. This observation was later reproduced in other studies and confirmed in a WHO  
15 report [39].  
16

17 190 The totality of data already available in the Inter99 cohort range from information on birth size  
18 (weight and length) and prematurity, glucose tolerance at baseline and at 5-year follow-up, lifestyle  
19 intervention and general health information including comprehensive dietary data, numerous  
20 biomarkers, and genetic data (**Table 1, Figure 2**). The 20-year follow-up study includes physical  
21 deep phenotyping clinical examinations tailored to capture and expand our growing understanding of  
22 T2D and subgroups, as well as early and late metabolic and vascular manifestations, co-morbidities,  
23 and complications. Morbidity and mortality data is obtained from our extensive Danish registers. The  
24 195 existing detailed clinical and lifestyle information over 20 years will allow us to correct for those  
25 determinants in the analysis. This together will allow us to detect effects of age-related cardiovascular  
26 and metabolic phenotypes.  
27  
28  
29  
30

### 31 200 ***Deep phenotyping follow-up study***

#### 32 *Recruitment and clinical examinations*

33  
34 A search of the Danish civil registration register (CPR register) in December 2019 showed that 6,004  
35 (88.5%) of the Inter99 participants, who had participated in the baseline examination, were alive and  
36 had not emigrated; and thus, eligible for inclusion (**Figure 1**). There were no other eligibility criteria  
37 205 for study participation.  
38

39 All participants will be invited in the same order as examined at baseline to the clinical examination  
40 at The Center for Clinical Research and Prevention (CCRP) in Glostrup, Denmark. The first  
41 participant was examined on September 13, 2021. The data are collected in a highly standardized  
42 manner by trained health professionals. Data include repeated measures of the original health  
43 210 examinations (**Table 1**), studies of sub-clinical signs of early cardiometabolic changes using  
44 innovative technologies, lifestyle questionnaires, extended sub-studies of diet, activity, and glucose  
45 (the InterDAG study) and a vitamin K supplementation intervention (InterVitaminK trial) as well as  
46 collection of biological samples for a biobank (**Figure 2**) as described below and in detail in  
47 **Supplemental Methods**.  
48  
49  
50 215  
51

#### 52 • *Anthropometry and body composition*

53 Height is measured without shoes to the nearest cm, weight without shoes and overcoat to the  
54 nearest kg, and body mass index (BMI) calculated ( $\text{kg}/\text{m}^2$ ). Waist and hip circumferences are  
55 measured in cm using a non-stretchable tape and waist-to-hip ratio calculated. Segmental body  
56  
57 220  
58  
59  
60

composition is estimated from multi-frequency bioelectrical impedance analysis (InBody770, Biospace, Seoul, South Korea).

- *Arterial stiffness*

Arterial stiffness is assessed by the gold standard method of assessing direct arterial stiffness based on carotid-femoral Pulse Wave Velocity (cfPWV) using the SphygmoCor XCEL instrument (AtCor Medical, Sydney, Australia) [25].

- *Biobank*

Serum, plasma, and plasma urine will be collected from all participants. In a subgroup participating in the extended study on Diet, Activity and Glucose (InterDAG study) 24-hour urine samples and a fecal sample will be collected. This biobank allows for future analyses of selected biomarkers and multi-omics.

- *Blood biochemistry*

Fasting blood samples (minimum of six hours) (**Table 1**) are collected and analyzed within three hours (**Supplemental Methods**).

- *Blood pressure*

Blood pressure is measured thrice with an electronic blood pressure monitor (Microlife, Widnau, Switzerland) and fitting cuff after five minutes rest in sitting position.

- *Cardiac autonomic neuropathy*

As a measure of cardiac autonomic neuropathy, simple bedside tests using resting heart rate variability (HRV) indices or response in heart rate to standing, slow breathing, or the Valsalva maneuver (cardiovascular autonomic reflex tests [CARTs]) is used with a Vagus device (Medicus Engineering, Aarhus, Denmark) [40,41].

- *Cardiac CT*

All participants are offered a cardiac computerized tomography (CT) scan at the Department of Cardiology, Rigshospitalet in Copenhagen to determine coronary atherosclerosis, including coronary artery calcification score (CAC score), coronary stenosis, vascular extent and plaque type in addition to cardiac chamber size and left ventricular hypertrophy. The cardiac CT scan includes a non-contrast CT scan and a CT angiography performed using the 320-multidetector scanner (Aquilion One, Toshiba Medical Systems, Japan) [42,43]. In addition to cardiac risk assessment, the CT scan includes comprehensive imaging of lungs, vascular system, sarcopenia assessment, liver, spleen, abdominal fat, and spine.

- *Covariates*

At baseline participants answered a questionnaire on sex, age, marital status, occupation, education, health (diagnoses of, e.g., cancer, diabetes, hypertension, high cholesterol, myocardial infarction, stroke, or coeliac disease) and lifestyle (physical activity, smoking, alcohol, and dietary

habits) [29]. At follow-up participants answer additional questions on sarcopenia symptoms, sleep, sedentary behavior, and physical activity [44–46].

265  
266  
267  
268  
269  
270  
271  
272  
273  
274  
275

- *Electrocardiography (ECG)*

Ten second 12-lead ECG is digitally recorded at 500 hz for 10 seconds and analyzed using the Marquette 12SL algorithm (v. 21, GE Healthcare, Milwaukee, WI, USA) [47].

276  
277  
278  
279  
280  
281  
282  
283  
284  
285  
286  
287

- *Liver stiffness and steatosis*

Noninvasive assessment of liver stiffness by transient elastography (TE) is performed after a minimum of 4-hrs fasting (FibroScan 502 Touch, Echosens, Baarn, Netherlands). The FIB-4 (Fibrosis-4) score will be calculated [48].

288  
289  
290  
291  
292  
293  
294  
295  
296  
297  
298  
299

- *Muscle strength (hand grip and chair stand)*

Muscular fitness is assessed using standardized protocols of muscle performance in the upper and lower extremity. Hand grip is measured using a Jamar® dynamometer (Sammons Preston Rolyan, Chicago, IL, USA) [49]. Lower body muscle performance is measured using the Sit-to-Stand test (STS) [50].

300  
301  
302  
303  
304  
305  
306  
307  
308  
309  
310  
311

- *Oxygen saturation*

Oxygen saturation is determined by direct measurement with the Nellcor™ portable SpO<sub>2</sub> pulse oximeter after blood sampling and 0 minutes rest in the supine position. Measurements is taken in the index finger of the opposite arm of blood sampling (Medtronic, Minneapolis, MN, USA).

312  
313  
314  
315  
316  
317  
318  
319  
320  
321  
322  
323

- *Fundus characteristics*

Ocular wide-field fundus photography and optical coherence tomography (OCT) are made in both eyes using the Optos Monaco device (Optos PLC, Dunfermline, UK) [51]. Images and scans are graded for retinopathy according to a modified version of the ‘Proposed International Clinical DR severity scale’ [52] applying a deep learning algorithm by convolutional neural networks [53].

324  
325  
326  
327  
328  
329  
330  
331  
332  
333  
334  
335

- *Urine*

A spot urine sample is collected and analyzed for sodium, potassium, albumin, and creatinine concentration.

336  
337  
338  
339  
340  
341  
342  
343  
344  
345  
346  
347

### ***Extended clinical studies***

The study serves as a recruitment platform for the InterVitaminK Randomized Controlled Trial [25], as well as for the extended lifestyle and diurnal plasma glucose profiling InterDAG study as described below and in details in the **Supplemental Methods**.

348  
349  
350  
351  
352  
353  
354  
355  
356  
357  
358  
359

#### ***InterVitaminK trial***

In total, 450 men and women who participated in the Inter99 20-year follow-up study with detectable CAC (CAC $\geq$ 10 Agatston units) assessed by the cardiac CT scan will be recruited to participate in the double-blinded placebo-controlled randomized intervention trial, the InterVitaminK trial,

1  
2  
3  
4 305 investigating the effect of Vitamin K supplementation on progression of CAC (**Table 1, Figure 2**) as  
5 described in more detail elsewhere [25].  
6  
7

#### 8 *InterDAG study (Diet, Activity, and Glucose)*

9  
10 The InterDAG study will recruit 1000 consecutive participants from the Inter99 follow-up study with  
11 310 no exclusion criteria. Glucose levels are measured continuously for 10 days using continuous glucose  
12 monitoring (CGM) (Dexcom G6 PRO, Hudson, OH, USA). Simultaneously, comprehensive data on  
13 dietary intakes are collected, including urinary sodium and potassium, and physical activity  
14 simultaneous collection of a 7-day food record (MyFood24, [www.myfood24.org](http://www.myfood24.org)), 10-day physical  
15 activity (24-hour Sens Motion® accelerometers, [www.sens.dk](http://www.sens.dk), Copenhagen, Denmark). Participants  
16 are also invited for a 3-day repeated 24-hour urine collection and one single fecal collection for later  
17 315 analyses. The simultaneous measurements of daily physical activity and diet will increase our  
18 understanding of the extent to which current lifestyle in older people influence, not only glucose  
19 regulation and variability, but also cardiometabolic health in general, including ectopic fat deposition,  
20 sarcopenia, and early vascular dysfunctions. The 24-hour urine collection will provide unique data  
21 on the sodium to potassium ratio, while the gut microbiota from fecal samples will provide insights  
22 into interaction between microbiota and metabolic diseases [54–56].  
23  
24 320  
25  
26  
27

#### 28 *Expected timeline*

29  
30 The cardiometabolic deep-phenotyping study including cardiac CT scans and 7-day continuous  
31 325 monitoring of diet, activity, and glucose (the InterDAG) in a sub-group will be completed in April  
32 2024. Data cleaning, validation and organization of the database is expected to be completed by end  
33 2024.  
34  
35

#### 36 *Register-based follow-up of the Inter99 cohort*

37 330 The Inter99 cohort is linked to the nationwide Danish registries by the unique Danish CPR number.  
38 The registries cover hospital admissions, outpatient contacts, primary health care use, reimbursement  
39 of medicine, and a variety of social parameters (education, income, employment, ethnicity etc.).  
40 Information on date of T2D diagnosis is obtained from a newly established Danish Diabetes Register  
41 (DMreg) based on comprehensive data from the National Patient Register [57], the Medicines  
42 Products Register [58], the National Health Service Registry [59], the Danish Adult Diabetes  
43 335 Database [60], and the Eye Examination Database [61]. The algorithm calculating the date of diabetes  
44 diagnosis is described elsewhere [62]. Clinical and biochemical data to estimate trajectories following  
45 T2D diagnosis will be obtained from LABKA (Clinical Laboratory Information System Research  
46 Database) [63]. Information on date of various CVD and cerebrovascular disease diagnoses is based  
47 on the Danish National Patient Register [64], using International Classification of Diseases (ICD-10)  
48 340 codes. CVD is defined as atrial fibrillation, heart failure, hypertensive disease, ischemic heart disease.  
49 Cerebrovascular disease is defined as haemorrhagic stroke, ischemic stroke, and transient cerebral  
50 ischemia. Occurrence of macrovascular atherosclerotic disease will also be available from the  
51 registers.  
52  
53  
54  
55  
56

57 345  
58  
59  
60

### ***Data analysis plan***

As described in Table 1, this study will provide a wealth of data and future analyses strategies will depend on the research question and outcome in focus. The statistical methods described below serves as an example of the methods most likely to be used, while alternative approaches will be applied when appropriate.

As the established Inter99 20-year follow-up database will form the basis for testing several research questions, the analyses should be considered explorative in nature. However, a main hypothesis of the Inter99 20-year follow-up was to investigate whether low birthweight independent of genetics, lifestyle and glucose tolerance over 20 years is related to common T2D cardiometabolic comorbidities. For the register-based follow-up studies, Poisson regression and other time to event models (e.g., Cox proportional hazards models) will be applied to estimate incidence rates and hazard ratios with 95% confidence intervals, respectively, of clinical outcomes like T2D and CVD. Relevant covariates such as socioeconomic factors, adult BMI, and gene risk scores of cardiometabolic morbidity and obesity will be adjusted for in separate models. In other analysis, we will use multilevel longitudinal modelling to estimate clinical trajectories of markers of glycated hemoglobin, lipid levels, blood pressure, body mass index and kidney function as a function of various lifestyle-related and perinatal (e.g., birthweight) exposures.

Both binary (e.g., hypertension and retinopathy), categorical (e.g., sarcopenia and muscle strength) and continuous outcomes (e.g., CAC score, fibrosis score, polygenetic risk scores, and body composition) will be employed. We will use multiple logistic regression for binary outcomes, multinomial logistic regression for categorical outcomes and multiple linear regression for continuous outcomes. For each outcome, a series of models will be developed based on a priori knowledge about the causal framework around the association of interest. To assess the strength and direction of associations, we will report odds ratios and regression coefficients with corresponding 95% confidence intervals.

We will apply causal epidemiological techniques to identify and quantify the causal relationships of various lifestyle-related, genetic, and perinatal (e.g., birthweight) exposures with cardiometabolic outcomes, while predictive modeling will be applied to develop algorithms that can predict future disease risk. The model and variable selection will depend on the research question. One approach is the concept of causal models and causal directed acyclic graphs. For some research questions it is also possible to use genetic risk scores as unbiased instruments of exposures. When optimal prediction of disease is the main purpose, models will be compared by using C-statistics and other related approaches.

As the clinical relevance has been an integral part of this study from the beginning, we aim to develop a series of interactive clinical tools that apply the developed prediction models for various cardiometabolic disease outcomes such as a T2D and CVD risk engine calculators. The combination of the wealth of cardiometabolic deep phenotyping data from the ongoing 20-year follow-up, polygenetic risk scores, lifestyle factors and perinatal factors such as objectively measured birth weight in a large sample of aging adults, provides a hitherto unparalleled potential for the development of real personalized risk prediction tools.

### ***Patient and public involvement***

1  
2  
3  
4 None.  
5  
6 390

## 7 **ETHICS AND DISSEMINATION**

---

9 The study is conducted in accordance with the Declaration of Helsinki II and is approved by the  
10 ethical committee of the Capital Region, Denmark (Inter99 follow-up, H-21033114; InterVitaminK  
11 trial, H-20076231) and by the Danish Data Protection Agency (P-2020-1074). Informed consent is  
12 obtained from all participants before clinical examinations. Clinicaltrials.gov registration:  
13 395 NCT05166447 and NCT05259046, respectively. Examinations are considered harmless, involve  
14 minimal inconvenience, and are performed by experienced healthcare professionals. Performing CT-  
15 scans may result in incidental findings that need further examination and potentially treatment. As  
16 for other screening procedures this may cause both benefit (early detection and treatment) and harm  
17 (over-treatment) to the participants. The radiation dose associated with the CT-scan is relatively low  
18 and considered of minimal risk.  
19 400

20 Findings will be disseminated in peer-reviewed journals, at national and international conferences,  
21 and via presentations to all interested stakeholders including patients and public health policymakers.  
22 Data may be made available for international collaborations upon request.  
23  
24  
25  
26 405

## 27 **DISCUSSION**

---

29 The Inter99 cohort has contributed substantially to our understanding of the multifactorial origin,  
30 natural history, as well as potential for early detection and prevention of T2D and its associated  
31 cardiometabolic co-morbidities. While it, from a modern epidemiologic perspective may appear  
32 relatively small, the Inter99 cohort is firmly established as an international competitive  
33 410 cardiometabolic epidemiological research resource due to its high data quality and data richness. As  
34 such, there is a strong foundation and a very high potential to perform a 20-year follow-up study of  
35 the now 50- to 80-year-old Inter99 participants.

36 So far, clinical reexaminations of the Inter99 cohort have been performed after 1, 3 and 5 years, and  
37 registry follow-up studies after 10 years. The planned 20-years follow-up study will include a  
38 415 combination of innovative cardiometabolic deep-phenotyping clinical examinations combined with  
39 comprehensive Danish national registry follow-up studies. While the Danish registries captures overt  
40 T2D and co-morbidity diagnoses, as well as use of medications, hospital admissions, selected  
41 biochemical analyses, etc., a parallel and synergistic deep phenotyping study will allow us to  
42 determine several of the most import early disease manifestations present even prior to any official  
43 and often arbitrary cardiometabolic disease diagnosis criteria. Accordingly, the complimentary study  
44 approaches will enable us to quantify the extent to which the T2D associated co-morbidities coronary  
45 arteriosclerosis, cardiac autonomic neuropathy, coronary calcification, NAFLD, retinopathy, and  
46 diabetic kidney disease are present among elderly people without T2D and with a known normal  
47 420 glucose tolerance for two decades. The existing comprehensive genetic, birthweight, and lifestyle  
48 information, collected and analyzed over 20 years, provides unparalleled opportunities to determine  
49 how individual or groups of risk factors affect the natural history of overt and/or preclinical disease  
50 manifestations during the most relevant age window with the highest occurrence rates of T2D and  
51 associated cardiometabolic diseases. The complementary data most importantly increases our signal  
52  
53 425  
54  
55  
56  
57  
58  
59  
60



1  
2  
3  
4  
5  
6  
7  
8  
9  
10  
11  
12  
13  
14  
15  
16  
17  
18  
19  
20  
21  
22  
23  
24  
25  
26  
27  
28  
29  
30  
31  
32  
33  
34  
35  
36  
37  
38  
39  
40  
41  
42  
43  
44  
45  
46  
47  
48  
49  
50  
51  
52  
53  
54  
55  
56  
57  
58  
59  
60

430 to noise ratio, and thus statistical power, to detect the relative contribution of a variety of distinct risk factors. For instance, having near complete GWAS data allows adjustment for putative genetic confounders influencing associations between birthweight and overt or preclinical disease. All pieces of information with high importance to understand the heterogeneity, and thus for driving, innovating, and implementing precision medicine, of T2D and co-morbidities. Compared with other prospective cardiometabolic studies including the FHS (Framingham Heart Study) and MESA (Multi-Ethnic Study of Atherosclerosis), a unique feature of the Inter99 cohort, is its detailed assessment of glucose tolerance with standard 75-gram oral glucose tolerance tests in all participants at the baseline examinations, as well as our broader focus on diabetes related cardiometabolic outcome variables including assessments of subclinical diabetes related disease manifestations in arteries, liver, eye, kidney, and nerves at the 20-years follow-up examinations.

440 The major etiological factors underlying risk of T2D, and its co-morbidities include genetics on one side, and pre- and postnatal environmental exposures on the other (**Box 1**). As for risk factors in pregnancy, the remarkably most accurate marker predicting cardiometabolic disease is weight at the time of birth [65,66]. While there has been much focus on identifying more specific exposures underlying the association between LBW and disease risk, no single factor influencing fetal growth during pregnancy has yet been identified to explain the association. In contrast, multiple epidemiological and animal studies have documented that virtually all factors in pregnancy that negatively influence fetal growth and birthweight including maternal smoking, diet, and energy intake, reduced placental blood flow etc. are associated with increased risk of cardiometabolic diseases in the offspring [67]. Accordingly, rather than representing only a risk marker, LBW may represent a mediator of the totality of adverse events and lifestyle factors in pregnancy that influence later risk of cardiometabolic diseases in the offspring, justifying birthweight as the so far unparalleled cardiometabolic risk marker of prenatal disease exposures.

450 Based on the Inter99 baseline health examinations, we previously confirmed LBW to be associated with T2D prevalence at a mean age of only 46 years [35]. As the first 20-year follow-up initiative, we studied the association between birthweight and T2D incidence rates [68]. Using the Danish registries, birth records of 4,590 Inter99 participants were linked with age at T2D diagnosis, as well as relevant covariates. We identified 492 new T2D cases since 1999, and subsequently documented that T2D incidence rate decreased with increasing birthweight in a surprisingly linear manner [68].

460 Interestingly, our study clearly supported the notion that the other major etiological factors of genetics and obesity appeared to operate as independent and most likely additive risk factors on top of that of lower birthweight [68].

470 Further comprehensive registry analyses of the full range of T2D vascular complications and co-morbidities will provide unparalleled insights into previously unrecognized differential T2D and co-morbidity sub-phenotypes and their underlying etiologies. Here, we for example can determine the extent to which T2D patients with the lowest birthweights may be characterized by a more severe clinical presentation as recently suggested [13]. To improve our understanding of T2D and its sub-phenotypes, similar analytical strategies will be applied for the various early disease markers and manifestations determined in the deep phenotyping clinical follow-up study.

The extended InterDAG subgroup study is aiming to better understand (and adjust for) the impact of diet, whole body sodium and potassium balance, as well as physical activity, on diurnal glucose levels

1  
2  
3  
4 and fluctuations across a wide range of the glucose tolerance spectra. Blood samples available from  
5 the baseline health examinations, along with samples from the reexaminations, will be available for  
6 extended micronutrient and multi-omics analyses including whole genome sequencing,  
7 metabolomics, lipidomics, transcriptomics, epigenomics, proteomics, and metagenomics. Our vision  
8 475 includes extensive application of AI based analyses to integrate the clinical, biochemical, and genetic  
9 data over time, across and beyond current clinical diagnostic cardiometabolic disease criteria.

10  
11 The Inter99 20-year follow-up study furthermore provides a unique opportunity to study age-related  
12 outcomes, such as sarcopenia and physical function. It is well established that lifestyle (diet, physical  
13 activity, smoking and BMI) influences the risk of chronic disease, thus Inter99 20-year data will allow  
14 480 for the study of long-term impact of lifestyle in early adulthood on subsequent age-related disease  
15 manifestations. These data will for instance allow us to study the trends in dietary habits and physical  
16 activity patterns and their impact on muscle strength and function in middle- and old age in people  
17 with and without T2D or CVD. As such, our Inter99 follow-up study will provide important insights  
18 into the mechanisms underlying age-related processes in both healthy and diseased individuals.

19 An inherent limitation of the study is its observational nature that does not allow us to make strong  
20 inferences about causality. Further limitations include the fact that all individuals participated in  
21 screening for CVD risk and a personalized lifestyle intervention program from 1999 up to five years  
22 485 thereafter, as well as the likelihood that only the healthiest cohort participants may show up for the  
23 follow-up examinations, both potentially limiting the generalizability of our findings. Finally, nearly  
24 all participants are of Danish ethnicity, as Danish literacy was a prerequisite at baseline inclusion.

25 In conclusion, the current combined epidemiological registry and deep phenotyping 20-year clinical  
26 follow-up study provides an example of the value of reexamining an existing and already extensively  
27 characterized T2D and cardiometabolic cohort, with the overall aim to better understand etiologically  
28 490 distinct disease trajectories and sub-phenotypes. This will facilitate development of better and more  
29 efficacious precision medicine prediction, clinical care, as well as overall treatment approaches in  
30 T2D and associated diseases. The cohort data will via a scientific steering group be available for  
31 international collaborations.

## 500 510 520 530 540 550 560 570 580 590 600 **Acknowledgements**

Thank you to the Inter99 participants for their invaluable contribution to the 20-year follow-up study.  
We also thank our team at CCRP, Glostrup, Denmark including Thomas Meinertz Dantoft, Anne-  
505 Mette Bergmann, Pernille Hesselholt Geer, Gert Mehl Virenfeldt, Nanna Riis, Anna Stage Hansen,  
Emil Buch Fromberg, Tina Rasmussen, Ida Foss Engelsted, Henriette Levin, Ane Lund Hjortshøj,  
Karen Vrdlovec Holck, Charlotte Wibling for securing a second-to-none data collection. Evy Ottesen  
and Kirsten Piepgras Neergaard from Corelab, SDCC, Herlev, Denmark for providing technical  
assistance.

## **Contributors**

KB and CB drafted the first version of the manuscript. AV and AL initiated the study. KB, CB, MA,  
58 FBK, CFBN, BL, RW, CS, KN, NRJ, CSU, MK, NG, JK, LML, LK, ALM, KFK, RL, TH, AL, AV

1  
2  
3  
4  
5  
6  
7  
8  
9  
10  
11  
12  
13  
14  
15  
16  
17  
18  
19  
20  
21  
22  
23  
24  
25  
26  
27  
28  
29  
30  
31  
32  
33  
34  
35  
36  
37  
38  
39  
40  
41  
42  
43  
44  
45  
46  
47  
48  
49  
50  
51  
52  
53  
54  
55  
56  
57  
58  
59  
60

designed and managed the study. All authors critically reviewed the manuscript, read, and approved the final version of the manuscript.

### Funding

The 20-year follow-up study is initiated by Professor, Chief Physician, PhD, DMSc. Allan Vaag (co-PI) Steno Diabetes Center Copenhagen (SDCC) and Professor Allan Linneberg (co-PI) the Center for Clinical Research and Prevention (CCRP). SDCC and CCRP have funded the clinical follow-up examinations. The following institutions have further contributed to the data collection including, The Novo Nordisk Foundation Center for Basic Metabolic Research, an independent Research Center based at the University of Copenhagen, Denmark and partially funded by an unconditional donation from the Novo Nordisk Foundation (NNF18CC0034900). The Laboratory of Genomics and Biomedicine, Department of Biology, University of Copenhagen, The Institute of Sports Medicine, Bispebjerg Hospital, Copenhagen, The Danish Diabetes Academy funded by the Novo Nordisk Foundation (NNF17SA0031406).

### Competing interests

None declared.

### References

---

- 1 International Diabetes Atlas. IDF Diabetes Atlas 2021. 2021. <https://diabetesatlas.org/atlas/tenth-edition/>
- 2 Roth GA, Mensah GA, Johnson CO, *et al.* Global Burden of Cardiovascular Diseases and Risk Factors, 1990-2019: Update From the GBD 2019 Study. *J Am Coll Cardiol* 2020;**76**:2982–3021. doi:10.1016/j.jacc.2020.11.010
- 3 Gedebjerg A, Almdal TP, Berencsi K, *et al.* Prevalence of micro- and macrovascular diabetes complications at time of type 2 diabetes diagnosis and associated clinical characteristics: A cross-sectional baseline study of 6958 patients in the Danish DD2 cohort. *J Diabetes Complications* 2018;**32**:34–40. doi:10.1016/j.jdiacomp.2017.09.010
- 4 Tomic D, Shaw JE, Magliano DJ. The burden and risks of emerging complications of diabetes mellitus. *Nat Rev Endocrinol* 2022;**18**:525–39. doi:10.1038/s41574-022-00690-7
- 5 Vujkovic M, Keaton JM, Lynch JA, *et al.* Discovery of 318 new risk loci for type 2 diabetes and related vascular outcomes among 1.4 million participants in a multi-ancestry meta-analysis. *Nat Genet* 2020;**52**:680–91. doi:10.1038/s41588-020-0637-y
- 6 Mahajan A, Taliun D, Thurner M, *et al.* Fine-mapping type 2 diabetes loci to single-variant resolution using high-density imputation and islet-specific epigenome maps. *Nat Genet* 2018;**50**:1505–13. doi:10.1038/s41588-018-0241-6
- 7 Hales CN, Barker DJ, Clark PM, *et al.* Fetal and infant growth and impaired glucose tolerance at age 64. *BMJ* 1991;**303**:1019–22. doi:10.1136/bmj.303.6809.1019

- 1  
2  
3  
4 8 Ravelli ACJ, van der Meulen JHP, Michels RPJ, *et al.* Glucose tolerance in adults after  
5 prenatal exposure to famine. *The Lancet* 1998;**351**:173–7. doi:10.1016/s0140-  
6 6736(97)07244-9  
7  
8  
9 555 9 Wu L, Feng X, He A, *et al.* Prenatal exposure to the Great Chinese Famine and mid-age  
10 hypertension. *PLoS One* 2017;**12**. doi:10.1371/journal.pone.0176413  
11  
12 10 Tarry-Adkins JL, Ozanne SE. Nutrition in early life and age-associated diseases. *Ageing Res*  
13 *Rev.* 2017;**39**:96–105. doi:10.1016/j.arr.2016.08.003  
14  
15 11 Vaag AA, Grunnet LG, Arora GP, *et al.* The thrifty phenotype hypothesis revisited.  
16 560 *Diabetologia* 2012;**55**:2085–8. doi:10.1007/s00125-012-2589-y  
17  
18 12 Brøns C, Thuesen ACB, Elingaard-Larsen LO, *et al.* Increased liver fat associates with  
19 severe metabolic perturbations in low birth weight men. *Eur J Endocrinol* 2022;**186**:511–21.  
20 doi:10.1530/EJE-21-1221  
21  
22 13 Hansen AL, Thomsen RW, Brøns C, *et al.* Birthweight is associated with clinical  
23 characteristics in people with recently diagnosed type 2 diabetes. *Diabetologia* 2023;**1**.  
24 565 doi:10.1007/s00125-023-05936-1  
25  
26 14 Seok WP, Goodpaster BH, Strotmeyer ES, *et al.* Accelerated loss of skeletal muscle strength  
27 in older adults with type 2 diabetes: the health, aging, and body composition study. *Diabetes*  
28 *Care* 2007;**30**:1507–12. doi:10.2337/DC06-2537  
29  
30 31 570 15 Koo BK, Roh E, Yang YS, *et al.* Difference between old and young adults in contribution of  
32  $\beta$ -cell function and sarcopenia in developing diabetes mellitus. *J Diabetes Investig*  
33 2016;**7**:233–40. doi:10.1111/JDI.12392  
34  
35 16 Sayer AA, Syddall HE, Gilbody HJ, *et al.* Does sarcopenia originate in early life? Findings  
36 from the Hertfordshire Cohort Study. *Journals of Gerontology - Series A Biological Sciences*  
37 *and Medical Sciences* 2004;**59**:930–4. doi:10.1093/gerona/59.9.m930  
38 575  
39  
40 17 Afshin A, Sur PJ, Fay KA, *et al.* Health effects of dietary risks in 195 countries, 1990–2017:  
41 a systematic analysis for the Global Burden of Disease Study 2017. *The Lancet*  
42 2019;**393**:1958–72. doi:10.1016/S0140-6736(19)30041-8  
43  
44 18 WHO. Tackling NCDs: ‘best buys’ and other recommended interventions for the prevention  
45 and control of noncommunicable diseases. 2017.  
46 580  
47  
48 19 Binia A, Jaeger J, Hu Y, *et al.* Daily potassium intake and sodium-to-potassium ratio in the  
49 reduction of blood pressure: a meta-analysis of randomized controlled trials. *J Hypertens*  
50 2015;**33**:1509–20. doi:10.1097/HJH.0000000000000611  
51  
52 20 Aburto NJ, Hanson S, Gutierrez H, *et al.* Effect of increased potassium intake on  
53 585 cardiovascular risk factors and disease: systematic review and meta-analyses. *BMJ* 2013;**346**.  
54 doi:10.1136/BMJ.F1378  
55  
56 21 Perez V, Chang ET. Sodium-to-potassium ratio and blood pressure, hypertension, and related  
57 factors. *Adv Nutr* 2014;**5**:712–41. doi:10.3945/AN.114.006783  
58  
59  
60

- 1  
2  
3  
4 22 Stamler R. Implications of the INTERSALT study. *Hypertension* 1991;**17**:16–20.  
5 590 doi:10.1161/01.HYP.17.1\_SUPPL.I16  
6  
7 23 Stamler J, Rose G, Stamler R, *et al.* INTERSALT study findings. Public health and medical  
8 care implications. *Hypertension* 1989;**14**:570–7. doi:10.1161/01.HYP.14.5.570  
9  
10 24 Estruch R, Ros E, Salas-Salvadó J, *et al.* Primary Prevention of Cardiovascular Disease with  
11 a Mediterranean Diet Supplemented with Extra-Virgin Olive Oil or Nuts. *N Engl J Med*  
12 595 2018;**378**:e34. doi:10.1056/NEJMOA1800389  
13  
14  
15 25 Kampmann FB, Thysen SM, Nielsen CFB, *et al.* Study protocol of the InterVitaminK trial: a  
16 Danish population-based randomised double-blinded placebo-controlled trial of the effects of  
17 vitamin K (menaquinone-7) supplementation on cardiovascular, metabolic and bone health.  
18 *BMJ Open* 2023;**13**:e071885. doi:10.1136/bmjopen-2023-071885  
19  
20 26 Horikoshi M, Yaghoobkar H, Mook-Kanamori DO, *et al.* New loci associated with birth  
21 600 weight identify genetic links between intrauterine growth and adult height and metabolism.  
22 *NatGenet* 2012;**45**:76–82. doi:10.1038/ng.2477  
23  
24  
25 27 Warrington NM, Beaumont RN, Horikoshi M, *et al.* Maternal and fetal genetic effects on  
26 birth weight and their relevance to cardio-metabolic risk factors. *Nat Genet* 2019;**51**:804–14.  
27 605 doi:10.1038/s41588-019-0403-1  
28  
29 28 Horikoshi M, Beaumont RN, Day FR, *et al.* Genome-wide associations for birth weight and  
30 correlations with adult disease. *Nature* 2016;**538**:248–52. doi:10.1038/nature19806  
31  
32 29 Jørgensen T, Borch-Johnsen K, Thomsen TF, *et al.* A randomized non-pharmacological  
33 intervention study for prevention of ischaemic heart disease: baseline results Inter99. *Eur J*  
34 610 *Cardiovasc Prev Rehabil* 2003;**10**:377–86. doi:10.1097/01.hjr.0000096541.30533.82  
35  
36  
37 30 Thomsen TF, Davidsen M, Ibsen H, *et al.* A New Method for Chd Prediction and Prevention  
38 Based on Regional Risk Scores and Randomized Clinical Trials; PRECARD(R) and the  
39 Copenhagen Risk Score. *European Journal of Cardiovascular Prevention & Rehabilitation*  
40 2001;**8**:291–7. doi:10.1177/174182670100800508  
41  
42 31 Lau C, Vistisen D, Toft U, *et al.* The effects of adding group-based lifestyle counselling to  
43 615 individual counselling on changes in plasma glucose levels in a randomized controlled trial:  
44 the Inter99 study. *Diabetes Metab* 2011;**37**:546–52. doi:10.1016/j.diabet.2011.06.001  
45  
46  
47 32 Lau CJ, Pisinger C, Husemoen LLN, *et al.* Effect of general health screening and lifestyle  
48 counselling on incidence of diabetes in general population: Inter99 randomised trial. *Prev*  
49 620 *Med (Baltim)* 2016;**91**:172–9. doi:10.1016/j.ypmed.2016.08.016  
50  
51 33 Engberg S, Vistisen D, Lau C, *et al.* Progression to impaired glucose regulation and diabetes  
52 in the population-based Inter99 study. *Diabetes Care* 2009;**32**:606–11. doi:10.2337/dc08-  
53 1869  
54  
55 34 Pilgaard K, Færch K, Poulsen P, *et al.* Impact of size at birth and prematurity on adult  
56 625 anthropometry in 4744 middle-aged Danes – The Inter99 study. *J Dev Orig Health Dis*  
57 2010;**1**:319–28. doi:10.1017/S2040174410000413  
58  
59  
60

- 1  
2  
3  
4 35 Pilgaard K, Faerch K, Carstensen B, *et al.* Low birthweight and premature birth are both  
5 associated with type 2 diabetes in a random sample of middle-aged Danes. *Diabetologia*  
6 2010;**53**:2526–30. doi:10.1007/s00125-010-1917-3  
7  
8  
9 630 36 Horikoshi M, Yaghoobkar H, Mook-Kanamori DO, *et al.* New loci associated with birth  
10 weight identify genetic links between intrauterine growth and adult height and metabolism.  
11 *Nat Genet* 2013;**45**:76–82. doi:10.1038/ng.2477  
12  
13 37 Munch IC, Larsen M, Kessel L, *et al.* Cumulative glycemia and microangiopathy in subjects  
14 with impaired glucose regulation in the Inter99 study. *Diabetes Res Clin Pract* 2011;**91**:226–  
15 32. doi:10.1016/j.diabres.2010.10.017  
16 635  
17 38 Jørgensen T, Jacobsen RK, Toft U, *et al.* Effect of screening and lifestyle counselling on  
18 incidence of ischaemic heart disease in general population: Inter99 randomised trial. *BMJ*  
19 *(Online)* 2014;**348**. doi:10.1136/bmj.g3617  
20  
21 39 Eriksen CU, Rotar O, Toft U, *et al.* What is the effectiveness of systematic population-level  
22 screening programmes for reducing the burden of cardiovascular diseases? Copenhagen:  
23 640 2021.  
24  
25 40 Spallone V, Bellavere F, Scionti L, *et al.* Recommendations for the use of cardiovascular  
26 tests in diagnosing diabetic autonomic neuropathy \*. *Nutrition, Metabolism and*  
27 *Cardiovascular Diseases* 2011;**21**:69–78. doi:10.1016/j.numecd.2010.07.005  
28  
29 41 Hansen CS, Theilade S, Lajer M, *et al.* Cardiovascular autonomic neuropathy and bone  
30 645 metabolism in Type 1 diabetes. *Diabetic Medicine* 2018;**35**:1596–604.  
31 doi:10.1111/dme.13777  
32  
33 42 Fuchs A, Kühl JT, Sigvardsen PE, *et al.* Subclinical Coronary Atherosclerosis and Risk for  
34 Myocardial Infarction in a Danish Cohort A Prospective Observational Cohort Study. *Ann*  
35 *Intern Med* 2023;**176**:574–5. doi:10.7326/M22-3027  
36 650  
37 43 McDermott M, Newby DE. Contemporary Natural History of Coronary Artery Disease. *Ann*  
38 *Intern Med* 2023;**176**:574–5. doi:10.7326/M23-0533  
39  
40 44 Malmstrom TK, Miller DK, Simonsick EM, *et al.* SARC-F: a symptom score to predict  
41 persons with sarcopenia at risk for poor functional outcomes. *J Cachexia Sarcopenia Muscle*  
42 2016;**7**:28–36. doi:10.1002/jcsm.12048  
43 655  
44 45 Aadahl M, Jørgensen T. Validation of a New Self-Report Instrument for Measuring Physical  
45 Activity. *Med Sci Sports Exerc* 2003;**35**:1196–202.  
46 doi:10.1249/01.MSS.0000074446.02192.14  
47  
48 46 Malmstrom TK, Morley JE. SARC-F: a simple questionnaire to rapidly diagnose sarcopenia.  
49 *J Am Med Dir Assoc* 2013;**14**:531–2. doi:10.1016/J.JAMDA.2013.05.018  
50 660  
51 47 Kück K, Isaksen JL, Graff C, *et al.* Spatial QRS-T angle variants for prediction of all-cause  
52 mortality. *J Electrocardiol* 2018;**51**:768–75. doi:10.1016/j.jelectrocard.2018.05.011  
53  
54  
55  
56  
57  
58  
59  
60

1  
2  
3  
4  
5  
6  
7  
8  
9  
10  
11  
12  
13  
14  
15  
16  
17  
18  
19  
20  
21  
22  
23  
24  
25  
26  
27  
28  
29  
30  
31  
32  
33  
34  
35  
36  
37  
38  
39  
40  
41  
42  
43  
44  
45  
46  
47  
48  
49  
50  
51  
52  
53  
54  
55  
56  
57  
58  
59  
60665  
670  
675  
680  
685  
690  
695

- 48 McPherson S, Stewart SF, Henderson E, *et al.* Simple non-invasive fibrosis scoring systems can reliably exclude advanced fibrosis in patients with non-alcoholic fatty liver disease. *Gut* 2010;**59**:1265–9. doi:10.1136/GUT.2010.216077
- 49 Aadahl M, Beyer N, Linneberg A, *et al.* Grip strength and lower limb extension power in 19-72-year-old Danish men and women: the Health2006 study. *BMJ Open* 2011;**1**:e000192–e000192. doi:10.1136/bmjopen-2011-000192
- 50 Alcazar J, Losa-Reyna J, Rodriguez-Lopez C, *et al.* The sit-to-stand muscle power test: An easy, inexpensive and portable procedure to assess muscle power in older people. *Exp Gerontol* 2018;**112**:38–43. doi:10.1016/j.exger.2018.08.006
- 51 Byberg S, Vistisen D, Diaz L, *et al.* Optos wide-field imaging versus conventional camera imaging in Danish patients with type 2 diabetes. *Acta Ophthalmol* 2019;**97**:815–20. doi:10.1111/aos.14118
- 52 Wilkinson CP, Ferris FL, Klein RE, *et al.* Proposed international clinical diabetic retinopathy and diabetic macular edema disease severity scales. *Ophthalmology* 2003;**110**:1677–82. doi:10.1016/S0161-6420(03)00475-5
- 53 Lecun Y, Bengio Y, Hinton G. Deep learning. *Nature*. 2015;**521**:436–44. doi:10.1038/nature14539
- 54 Forslund K, Hildebrand F, Nielsen T, *et al.* Disentangling type 2 diabetes and metformin treatment signatures in the human gut microbiota. *Nature* 2015;**528**:262–6. doi:10.1038/nature15766
- 55 Qin J, Li Y, Cai Z, *et al.* A metagenome-wide association study of gut microbiota in type 2 diabetes. *Nature* 2012;**490**:55–60. doi:10.1038/nature11450
- 56 Jie Z, Xia H, Zhong S-L, *et al.* The gut microbiome in atherosclerotic cardiovascular disease. *Nat Commun* 2017;**8**:845. doi:10.1038/s41467-017-00900-1
- 57 Lynge E, Sandegaard JL, Rebolj M. The Danish National Patient Register. *Scand J Public Health* 2011;**39**:30–3. doi:10.1177/1403494811401482
- 58 Wallach Kildemoes H, Toft Sørensen H, Hallas J. The Danish National Prescription Registry. *Scand J Public Health* 2011;**39**:38–41. doi:10.1177/1403494810394717
- 59 Sahl Andersen J, De Fine Olivarius N, Krasnik A. The Danish National Health Service Register. <https://doi.org/10.1177/1403494810394718> 2011;**39**:34–7. doi:10.1177/1403494810394718
- 60 Jørgensen ME, Kristensen JK, Husted GR, *et al.* The Danish Adult Diabetes Registry. *Clin Epidemiol* 2016;**8**:429–34. doi:10.2147/CLEP.S99518
- 61 Andersen N, Hjortdal JØ, Schielke KC, *et al.* The Danish Registry of Diabetic Retinopathy. *Clin Epidemiol* 2016;**8**:613–9. doi:10.2147/CLEP.S99507
- 62 Carstensen, Bendix and Jørgensen ME. A Danish Diabetes Register. 2019. <http://bendixcarstensen.com/DMreg/Reg2016.pdf>

- 1  
2  
3  
4 700 63 Grann A.F., Erichsen R., Nielsen A.G., Frøslev T. and RTRW. Existing data sources for  
5 clinical epidemiology: The clinical laboratory information system (LABKA) research  
6 database at Aarhus University, Denmark. *Clin Epidemiol* 2011;**3**:133.  
7 doi:10.2147/clep.s17901  
8  
9  
10 64 Andersen TF, Madsen M, Jørgensen J, *et al*. The Danish National Hospital Register. A  
11 705 valuable source of data for modern health sciences. *Dan Med Bull* 1999;**46**:263–8.  
12  
13 65 Risnes KR, Vatten LJ, Baker JL, *et al*. Birthweight and mortality in adulthood: a systematic  
14 review and meta-analysis. *Int J Epidemiol* 2011;**40**:647–61. doi:10.1093/IJE/DYQ267  
15  
16 66 Kajantie E, Osmond C, Barker DJP, *et al*. Size at birth as a predictor of mortality in  
17 adulthood: A follow-up of 350 000 person-years. *Int J Epidemiol* 2005;**34**:655–63.  
18 710 doi:10.1093/ije/dyi048  
19  
20 67 Fernandez-Twinn DS, Hjort L, Novakovic B, *et al*. Intrauterine programming of obesity and  
21 type 2 diabetes. *Diabetologia* 2019 *62:10* 2019;**62**:1789–801. doi:10.1007/S00125-019-  
22 4951-9  
23  
24 68 Wibaek R, Andersen GS, Linneberg A, *et al*. Low birthweight is associated with a higher  
25 incidence of type 2 diabetes over two decades independent of adult BMI and genetic  
26 715 predisposition. *Diabetologia* 2023;**1**:3. doi:10.1007/s00125-023-05937-0  
27  
28  
29  
30  
31  
32  
33  
34  
35 720  
36  
37  
38  
39  
40  
41  
42  
43  
44  
45 725  
46  
47  
48  
49  
50  
51  
52  
53  
54  
55 730  
56

## Figure legends



1  
2  
3  
4  
5  
6  
7  
8  
9  
10  
11  
12  
13  
14  
15  
16  
17  
18  
19  
20  
21  
22  
23  
24  
25  
26  
27  
28  
29  
30  
31  
32  
33  
34  
35  
36  
37  
38  
39  
40  
41  
42  
43  
44  
45  
46  
47  
48  
49  
50  
51  
52  
53  
54  
55  
56  
57  
58  
59  
60

735

**Figure 1.** Flow chart of participation in the Inter99 study, 1999 – 2023. The dark blue column represents the Intervention group (A+B) where 52% of the invited had a baseline examination performed in 1999. The eligible participants for the 20-year follow-up study are recruited among these individuals. The light-blue columns indicate individuals followed by questionnaires (C) and the reference population (D) who are not recruited for the 20-year follow-up examinations.

740

**Figure 2.** Overview of the 20-year deep-phenotyping follow-up examinations and possibilities of coupling to baseline and register data as well as for future and extended analyses

745

For peer review only

**Table 1.** Summary of data collected at the Inter99 baseline and the 20-year follow-up study (including extended sub-studies)

| <b>Data</b>                                      | <b>Variables</b>                                                                                                                                                                                                                                                                                                             | <b>Baseline</b> | <b>20-year</b> |
|--------------------------------------------------|------------------------------------------------------------------------------------------------------------------------------------------------------------------------------------------------------------------------------------------------------------------------------------------------------------------------------|-----------------|----------------|
| <b><i>Questionnaire-based information</i></b>    |                                                                                                                                                                                                                                                                                                                              |                 |                |
| Demographics                                     | Sex, age, family, marital status, education, employment status, household income                                                                                                                                                                                                                                             | X               | X              |
| Diseases                                         | Chronic diseases, contact to health care system, symptoms                                                                                                                                                                                                                                                                    | X               | X              |
| Health                                           | Self-rated health, stress, sleep                                                                                                                                                                                                                                                                                             | X               | X              |
| Lifestyle                                        | Physical activity, smoking, alcohol, diet, network                                                                                                                                                                                                                                                                           | X               | X              |
| <b><i>Deep-phenotyping health assessment</i></b> |                                                                                                                                                                                                                                                                                                                              |                 |                |
| Anthropometry                                    | Height, weight, waist, and hip circumference                                                                                                                                                                                                                                                                                 | X               | X              |
| Bioelectrical impedance                          | Fat and lean (muscle) body mass                                                                                                                                                                                                                                                                                              |                 | X              |
| Blood pressure                                   | Systolic and diastolic blood pressure, resting heart rate                                                                                                                                                                                                                                                                    | X               | X              |
| Cardiac autonomic neuropathy                     | Resting heart rate variability and cardiovascular autonomic reflex tests                                                                                                                                                                                                                                                     |                 | X              |
| Cardiac CT                                       | Coronary atherosclerosis, cardiac chamber size, LV hypertrophy                                                                                                                                                                                                                                                               |                 | X              |
| Continuous glucose monitoring                    | 7-day 24-hour glucose levels                                                                                                                                                                                                                                                                                                 |                 | X(S)           |
| Dynamometer and sit-to-stand test                | Muscle strength                                                                                                                                                                                                                                                                                                              |                 | X              |
| Electrocardiography                              | ECG-intervals, -amplitudes and diagnostic statements                                                                                                                                                                                                                                                                         | X               | X              |
| Ophthalmic examination                           | Ocular fundus characteristics, retinopathy                                                                                                                                                                                                                                                                                   | X(S)            | X              |
| Oxymeter                                         | Oxygen saturation                                                                                                                                                                                                                                                                                                            |                 | X              |
| Pulse wave velocity                              | Arterial stiffness                                                                                                                                                                                                                                                                                                           |                 | X              |
| Spirometry                                       | Lung function                                                                                                                                                                                                                                                                                                                | X               | X(S)           |
| Transient elastography                           | Liver stiffness and steatosis                                                                                                                                                                                                                                                                                                |                 | X              |
| <b><i>Laboratory assessments</i></b>             |                                                                                                                                                                                                                                                                                                                              |                 |                |
| Blood biochemistry                               | Leukocytes and differential count, thrombocytes, electrolytes (sodium, potassium, calcium), glucose, HbA1c, lipids (total cholesterol, HDL, LDL, VLDL, triglycerides), kidney function (creatinine, eGFR, urea, albumin), Vitamin K status (dephosphorylated-uncarboxylated matrix-gla Protein), liver function (ALAT, ASAT) | X               | X              |
| Urine biochemistry                               | Albumin, creatinine, sodium, potassium                                                                                                                                                                                                                                                                                       | X               | X              |
| <b><i>Biobanking (-80°C)</i></b>                 |                                                                                                                                                                                                                                                                                                                              |                 |                |
| Blood                                            | Fasting blood samples (whole-blood, serum, and plasma)                                                                                                                                                                                                                                                                       | X               | X              |
| Urine                                            | Spot urine                                                                                                                                                                                                                                                                                                                   | X               | X              |
|                                                  | 24-hour urine collection                                                                                                                                                                                                                                                                                                     | X(S)            | X(S)           |

|       |               |      |
|-------|---------------|------|
| Feces | Fecal samples | X(S) |
|-------|---------------|------|

(S) Subgroup of participant.

For peer review only

1  
2  
3  
4  
5  
6  
7  
8  
9  
10  
11  
12  
13  
14  
15  
16  
17  
18  
19  
20  
21  
22  
23  
24  
25  
26  
27  
28  
29  
30  
31  
32  
33  
34  
35  
36  
37  
38  
39  
40  
41  
42  
43  
44  
45  
46

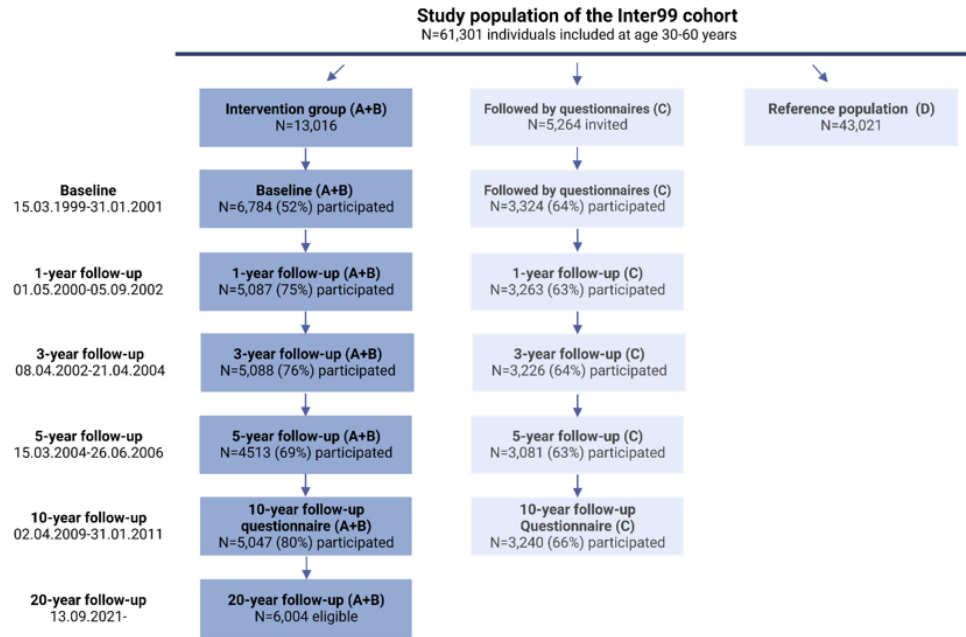

Figure 1. Flow chart of participation in the Inter99 study 1999 – 2023. The dark blue column represents the Intervention group (A+B) where 52% of the invited had a baseline examination performed in 1999. The eligible participants for the 20-year follow-up study are recruited among these individuals. The light-blue columns indicate individuals followed by questionnaires (C) and the reference population (D) who are not recruited for the 20-year follow-up examinations.

573x407mm (38 x 38 DPI)

Figure 2.

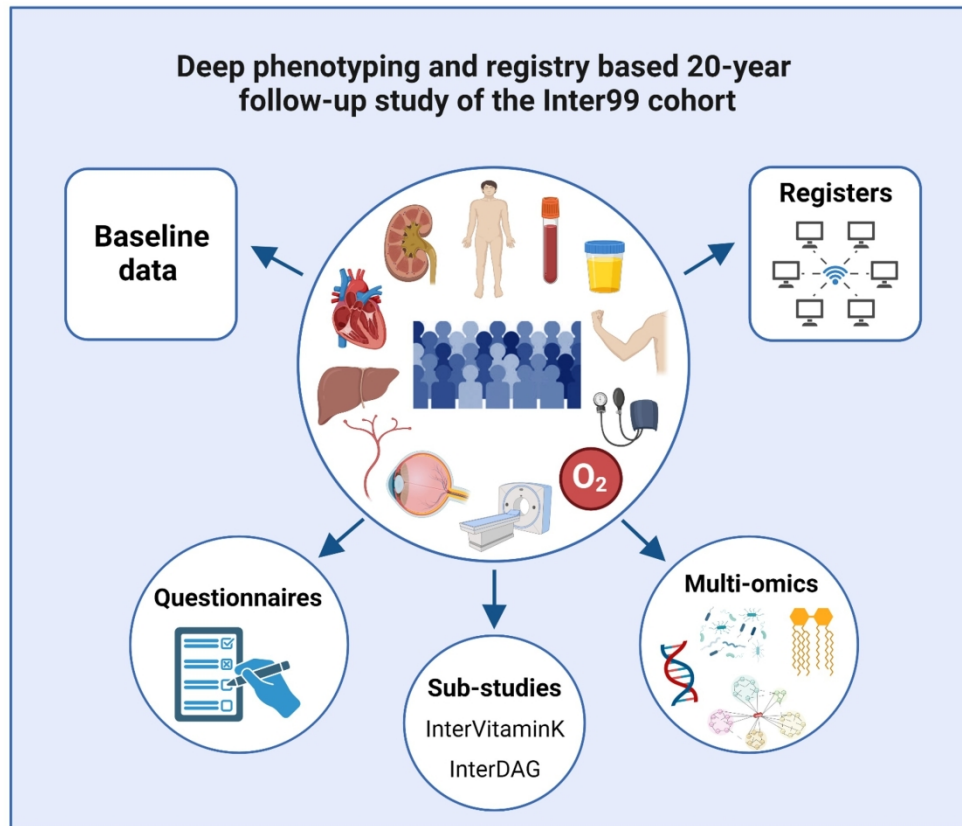

Figure 2. Overview of the 20-year deep-phenotyping follow-up clinical examinations, the possibilities of coupling to baseline and register data as well as for future and extended analyses.

183x167mm (330 x 330 DPI)

## Protocol for the combined cardiometabolic deep phenotyping and registry-based twenty-year follow-up study of the Inter99 cohort.

### SUPPLEMENTAL METHODS

#### Deep phenotyping follow-up study

##### *Arterial stiffness*

Arterial stiffness will be assessed based on carotid-femoral Pulse Wave Velocity (cfPWV) a non-invasive measure considered the gold standard method of assessing direct arterial stiffness [1]. The SphygmoCor XCEL instrument (AtCor Medical, Sydney, Australia) will be applied to measure cfPWV. cfPWV measurements are performed under standardized conditions according to guidelines [1] and follow the quality demands suggested by the manufacturer. Prior to the measurement, the participant must be fasting for 3 hours (including the absence of coffee, tea, smoking, and alcohol) and resting in a lying position for 10 minutes in a quiet room. Blood pressure is measured three times with a Microlife BP A6 PC blood pressure device, and the mean blood pressure is used. cfPWV is defined as the distance between the two recording sites divided by the difference in pulse wave travel time and expressed in meters per second. Distance is directly measured as a straight line by a caliper from the recording sites at the carotid to the femoral artery, and the total distance is multiplied by 0.8 [1]. The transit time is based on measurements of pulse waves assessed by use of an applanation tonometer at the carotid artery on the neck and from a blood pressure cuff on the thigh. cfPWV measurements will be performed twice, and if these vary by more than 0.5 m/s, a third measurement will be performed.

##### *Biochemistry*

- *B-Leucocytes, B-Platelets and B-Leucocytes*: differential count will be sampled in EDTA-stabilized blood and analyzed on the Sysmex XN (Sysmex Corporation, Kobe, Japan) analyzer.
- *P-Sodium and P-Potassium*: will be sampled in Li-heparin-containing tubes and centrifuged to separate plasma and subsequently analyzed by potentiometric slide test on Vitros 4600/5600 instruments (QuidelOrtho, Raritan, USA).
- *P-Calcium (total)*: will be measured in Li-heparin plasma using a colorimetric slide test on Vitros 4600/5600 instruments.
- *P-Glucose*: blood will be collected in citrate buffer-fluoride mixture (FC-Mixture) tubes and analyzed on Vitros 4600/5600 instruments (QuidelOrtho) and P-HbA1c measurements will be done using EDTA-stabilized blood using a HPLC-based method on the Tosoh G8 instrument (Tosoh Bioscience, San Francisco, USA).

- *P-Total cholesterol, P-Triglyceride, and P-High-density lipoprotein (HDL) cholesterol*: blood will be collected in Li-heparin tubes and centrifuged and measured using colorimetric slide tests on the Vitros 4600/5600 instruments (QuidelOrtho). P-Very-low density lipoprotein (VLDL) cholesterol and P-Low-density lipoprotein (LDL) cholesterol will be calculated from the formula  $P\text{-VLDL} = 0.45 * P\text{-Triglyceride}$ ;  $P\text{-LDL} = P\text{-Total Cholesterol} - HDL - VLDL$ .
- *P-Alanine amino transferase (ALT), P-Aspartate aminotransferase (AST), P-Creatinine, P-Albumin and P-Urea*: blood will be collected in Li-heparin tubes, centrifuged and analytes will be measured using colorimetric slide tests on the Vitros 4600/5600 (QuidelOrtho). Estimated Glomerular Filtration Rate (eGFR) will be calculated using the CKD-EPI formula.
- *P-Aldosterone and P-Renin*: blood will be sampled in EDTA-containing tubes, centrifuged and plasma stored at  $-80^{\circ}\text{C}$  until analysis. Measurements will be done using chemiluminescence immunoassays on the dedicated IDS iSYS instrument (IDS PLC, Tyne and Wear, UK).
- *P-Dephosphorylated-uncarboxylated matrix-gla Protein (MGP)*: blood will be sampled in EDTA-containing tubes, centrifuged and plasma stored at  $-80^{\circ}\text{C}$  until analysis using the InaKtif MGP assay, which is a chemiluminescence immunoassay, on the IDS iSYS instrument (IDS PLC).
- *P-Aldosterone, P-Renin and P-MGP*: will be analyzed in one single batch to reduce variability on the measurements. All other analyses will be measured right after arrival at the clinical biochemistry laboratory.

#### *Cardiac Computed Tomography (CT) scans*

Cardiac CT scans will include a non-contrast CT scan to evaluate CAC score, aortic valve calcifications, lung density analysis, and bone mineral density (BMD). Furthermore, a CT angiography is applied to evaluate cardiovascular and heart structures and subclinical obstructive coronary atherosclerosis. In addition to cardiac risk assessment, the CT scan includes comprehensive imaging of lungs, vascular system, sarcopenia assessment, liver, spleen, abdominal fat, and spine.

CT imaging will be performed using a 320-multidetector scanner (Aquilion One, Canon Medical Systems). Participants are instructed to abstain from coffee, tea, cocoa, and chocolate from 4 p.m. the day before the CT scan. For participants with a heart rate of  $>60$  bpm and no contraindications, a cardio-selective beta-blocker (metoprolol 25–150 mg) is administered orally prior to the CT scan. Intravenous contrast media (Visipaque) is given after assessment of kidney function (estimated Glomerular Filtration Rate (eGFR)  $>60$  ml/min/1.73m<sup>2</sup>). A protocol using one rotation acquisition will be used. The total dose of radiation received from a single cardiac CT scan is approximately 3–10 mSv. For comparison, the average annual limit for radiation workers is 20 mSv and Denmark's annual background radiation dose is 3 mSv. According to the Danish National Committee on Biomedical Research Ethics, a radiation dose of 10 mSv may increase cancer risk by 0.05 % [1].

### *Muscle Strength (hand grip and chair stand)*

The participant will be sitting in an upright position with the arm along the side; and the arm bent at 90° with the elbow, forearm and wrist in a neutral position. The width of the handle will be adjusted to fit the hand size. Hand grip will be measured three times in the dominant hand with brief pauses between each measurement and the best three measurements considered as the maximum hand grip strength [5]. Verbal instructions will be given before performing the Sit-to-Stand test (STS) test. After the cue “ready set, go!” the participant will start to do STS repetitions as rapidly as possible from the sitting position, with arms crossed over the chest. Participant will perform the test five times, and the time needed to complete the task will be recorded with a stopwatch to the nearest 0.01 s. The subjects will be allowed to try 1-2 times with a resting period (30-60 s) before the definitive STS measure is annotated [6].

## **Extended clinical sub-studies nested within the twenty-year follow-up of the Inter99 cohort**

### **1. *The InterVitaminK trial***

As part of the InterVitaminK trial lung function will be assessed, Hereby, longitudinal spirometry data will be available in a sub-sample of the Inter99 20-year follow-up study [7].

#### *Spirometry*

Pulmonary function will be measured through spirometry performed with Vyntus SPIRO (Vyair Medical), disposable MicroGard pulmonary function filters with nose clips (V-892391) and Sentriesuite software (V3.20.3). The examinations will be performed according to the 2005 American Thoracic Society and the European Respiratory Society (ATS/ERS) spirometry standard [8] after a daily calibration with a 3-litre calibrated syringe. The spirometer calibration syringe will be calibrated yearly to comply with the international standard [9]. Body weight is measured using a digital scale (Tanita, BC 420), and 1 kg is automatically subtracted to account for the weight of the participant's clothes. Height is measured without shoes with a Holtain Harpenden Stadiometer (model: 602VR). Respiratory function measurements, i.e., expiratory forced vital capacity (FVC) and forced expiratory volume in one second (FEV1), will be conducted.

### **2. *The InterDAG Study***

Participants will receive information about and be invited to participate in ten days continuous glucose monitoring (CGM) and physical activity accelerometer measurements as well as seven-day food registration, three day 24-hr urine collection and one stool collection. Participants will be instructed to follow their usual routines during the collection period.

#### *Ten-day Physical activity measurements by Sens Motion® accelerometers*

Physical activity and sedentary behavior will be monitored by continuous 24-hour\*10 days measurement using Sens Motion® accelerometers (www.sens.dk) skin-taped to the right thigh. It will be possible to classify behavior second-by-second into the following activity types: sitting/lying,



1  
2  
3  
4 standing, walking, running, and cycling. Raw accelerometer data will also be classified as time spent  
5 in different intensity levels, including vigorous, moderate, and light intensity activity. The Sens  
6 Motion® accelerometer collects second by second movement data from three axes (vertical,  
7 horizontal and lateral), and is small, (45 x 4.5 x 23 mm) lightweight 7g) and waterproof with a  
8 sampling acceleration at 12 Hz and a range of  $\pm 4G$ . The Sens Motion patch will be attached to the  
9 thigh using hypo-allergenic dressing at the CCRP. After wearing the accelerometer for 24-hours\*10  
10 days, participants will return the accelerometer to the CCRP and collected data will be automatically  
11 transmitted to secure Cloud storage via the smartphone app. During the 10 days of wearing the Sens  
12 Motion® accelerometer, participants will be asked to keep a log on daily work and sleep times.  
13  
14  
15  
16

### 17 *Seven-day food record*

18  
19 At the end of each day, participants will register food and drink intake, applying the online dietary  
20 assessment software myfood24®. It is structured according to a typical meal pattern covering  
21 breakfast, lunch, dinner and snacks plus drinks. The participants will be able to search for items and  
22 estimate the consumed amount by selecting the closest portion size using portion size pictures,  
23 provided weights, or entering an exact amount. Internal prompts for frequently forgotten items like  
24 condiments, snacks, confectionary, and beverages are included. And there is also a recipe builder  
25 feature. Furthermore, there is the option for participants to report intake of nutritional supplements  
26 and if the day represented a usual or unusual intake, including reasons for unusual intakes such as  
27 illness or special occasions. To assist recordings, participants will be given a 7-day food diary to  
28 record food intake. If the needed computer skills are lacking, the paper food diary will be recorded  
29 by the staff.  
30  
31  
32  
33

### 34 *Three-day 24 hr urine sample*

35  
36 The urine collection will be carried out simultaneous with the 7-day food record. Participants will  
37 receive a brown bottle (3 L), and a smaller 'visiting bottle' (0.5 L), a large bottle and urine monovettes  
38 (Sarstedt, Nümbrecht-Rommelsdorf, Germany) for collection of urine aliquots after the completion  
39 of each 24 h collection period. A pen to mark containers and monovettes with name, day, and volume.  
40 For validation participants will also receive 3 times 3 80 mg para-aminobenzoic acid (PABA) tablets  
41 (Glostrup Hospital Pharmacy). A sheet to register beginning and ending of the collection periods,  
42 PABA administration and exceptions to the protocol (i.e., estimation of urine loss, medicine).  
43 Participants will be informed to collect 24 h urine for three consecutive days (1 weekend day, 2  
44 working days). All participants will receive verbal and printed instructions (including a video link)  
45 on how to collect 24 h urine: All urine must be collected during a 24 h period starting from the second  
46 urine sample on the morning of the collection day and ending with the first urine sample from the  
47 following morning. The morning, after completion of the 24 h urine collection participants must mark  
48 the volume and day of the collection on the container and registered values in the data sheet. Also,  
49 the time of start and finish of the urine collections, and the time of taking the PABA tablets will be  
50 recorded together with deviations to the instructions. After volume recording, the urine in the  
51 container will be mixed before taking out aliquots. Hereafter monovettes will be frozen at home -20  
52 °C until returned to CCRP. Containers will be rinsed with water and participants can resume their  
53 next 24 h urine collection.  
54  
55  
56  
57  
58  
59  
60

1  
2  
3  
4 A well-trained health worker will check the readings of the total volume marked on the containers  
5 and urine aliquots will stored at -80 °C before being transported to a certified laboratory for analysis  
6 of sodium, potassium, albumin, creatinine and for PABA analyses. Based on the participants daily  
7 recordings of diuresis the 24 h-values of sodium, potassium, albumin and creatinine will be  
8 determined. PABA is an accepted objective marker to verify completeness of 24 h urine sampling in  
9 adults [10]. The underlying assumption is that PABA is excreted almost quantitatively in 24 h. On  
10 collection days adults ingested 240 mg of PABA, divided into three doses of 80 mg (one with each  
11 main meal). According to the HPLC method applied a PABA recovery in the urine above 77.9% of  
12 total ingested dose indicates urine has been collected for 24 h [11]. However, PABA recovery levels  
13 above 105% will be regarded as mistaken. If PABA recovery is not available urine collections with  
14 collection time less than 22.5 h or more than 25.5 h will be excluded as well as urine collections with  
15 volume <500 mL/24 h for adults [11].  
16  
17  
18  
19  
20

### 21 *Fecal sample*

22 Stool samples will be collected at home by the participants in a 5 mL tube, and directly put in minus  
23 20 freezers. Samples are transported from home to the lab in an insulated bag and stored in a minus  
24 80 freezers. At site the stool samples are aliquoted by the MGISTP-7000 robot to a 96well format.  
25 The DNA extraction itself takes place in MGISTP-960well robot, using the MGIEasy Stool  
26 Microbiome DNA extraction kit and its buffers (Cat.no 940-000122-00, MGI). Sequencing is done  
27 in the DNBSEQ-G400 from MGI using HotMPS High-throughput Sequencing Set (Cat.no 940-  
28 000091-00, MGI) for library preparations with a depth of 10GB/sample. Protocols written by the  
29 manufacture will be followed.  
30  
31  
32  
33  
34

### 35 **Deviations between examinations at baseline and twenty-year follow-up of the Inter99 cohort**

- 37 • Participants were fasting from 11 pm the night before baseline examinations compared to a  
38 minimum of six hours before examinations at follow-up.
- 39 • Blood was drawn from a peripheral venous catheter as well as a capillary sample taken from  
40 the finger or earlobe at baseline examinations as opposed to vacuettes used for blood sampling  
41 at follow-up.
- 42 • Spot urine samples were collected throughout the day, as compared to morning spot urine  
43 collection at follow-up.
- 44 • Blood pressure was measured by a mercury manometer at baseline and by an electronic blood  
45 pressure monitor at follow-up. At baseline the third measurement was only performed if blood  
46 pressure was above 140 systolic or 90 diastolic. At follow-up blood pressure is measured three  
47 times one minute apart.
- 48 • At Inter99 baseline ECGs were recorded using the Cardiosoft system GE Healthcare,  
49 Milwaukee, WI, USA while the devise used to record the ECGs at 20-year follow-up was a  
50 GE MAC VU 360.
- 51 • Ophthalmic examination a baseline included a 7-field non-stereoscopic 60-degree digital  
52 fundus photography (TRC-50X camera; Topcon, Tokyo, Japan) [12] and a follow-up ocular  
53  
54  
55  
56  
57  
58  
59  
60

1  
2  
3  
4 wide-field fundus photography and optical coherence tomography (OCT) are made using the  
5 Optos Monaco device (Optos PLC, Dunfermline, UK) [13].  
6  
7

- 8  
9
- Deep phenotyping examinations introduced at twenty-year follow-up study were:
    - Arterial stiffness
    - Body composition measured by impedance
    - Cardiac autonomic neuropathy
    - Coronary artery calcification
    - Fundus characteristics measured by OPTOS scanning
    - Liver stiffness and steatosis
    - Muscle strength
    - Oxygen saturation
- 10  
11  
12  
13  
14  
15  
16  
17  
18  
19  
20  
21  
22  
23  
24  
25  
26  
27  
28  
29  
30  
31  
32  
33  
34  
35  
36  
37  
38  
39  
40  
41  
42  
43  
44  
45  
46  
47  
48  
49  
50  
51  
52  
53  
54  
55  
56  
57  
58  
59  
60

## References

- 1 Van Bortel LM, Laurent S, Boutouyrie P, *et al.* Expert consensus document on the measurement of aortic stiffness in daily practice using carotid-femoral pulse wave velocity. In: *Journal of Hypertension*. Lippincott Williams and Wilkins 2012. 445–8. doi:10.1097/HJH.0b013e32834fa8b0
- 2 Kors JA, Van Herpen G, Sittig AC, *et al.* Reconstruction of the Frank vectorcardiogram from standard electrocardiographic leads: diagnostic comparison of different methods. *Eur Heart J* 1990;**11**:1083–92. doi:10.1093/oxfordjournals.eurheartj.a059647
- 3 Edenbrandt L, Pahlm O. Vectorcardiogram synthesized from a 12-lead ECG: Superiority of the inverse Dower matrix. *J Electrocardiol* 1988;**21**:361–7. doi:10.1016/0022-0736(88)90113-6
- 4 Rautaharju PM, Prineas RJ, Zhang Z-M. A simple procedure for estimation of the spatial QRS/T angle from the standard 12-lead electrocardiogram. *J Electrocardiol* 2007;**40**:300–4. doi:10.1016/j.jelectrocard.2006.11.003
- 5 Aadahl M, Beyer N, Linneberg A, *et al.* Grip strength and lower limb extension power in 19-72-year-old Danish men and women: the Health2006 study. *BMJ Open* 2011;**1**:e000192–e000192. doi:10.1136/bmjopen-2011-000192
- 6 Alcazar J, Losa-Reyna J, Rodriguez-Lopez C, *et al.* The sit-to-stand muscle power test: An easy, inexpensive and portable procedure to assess muscle power in older people. *Exp Gerontol* 2018;**112**:38–43. doi:10.1016/j.exger.2018.08.006
- 7 Kampmann FB, Thyssen SM, Nielsen CFB, *et al.* Study protocol of the InterVitaminK trial: a Danish population-based randomised double-blinded placebo-controlled trial of the effects of vitamin K (menaquinone-7) supplementation on cardiovascular, metabolic and bone health. *BMJ Open* 2023;**13**:e071885. doi:10.1136/bmjopen-2023-071885
- 8 Miller MR. Standardisation of spirometry. *Eur Respir J* 2005;**26**:319–38. doi:10.1183/09031936.05.00034805
- 9 Madsen F. Validation of spirometer calibration syringes. *Scand J Clin Lab Invest* 2012;**72**:608–13. doi:10.3109/00365513.2012.723739
- 10 Cox L, Guberg K, Young S, *et al.* Validation of the use of p-aminobenzoic acid to determine completeness of 24 h urine collections in surveys of diet and nutrition. *Eur J Clin Nutr* 2018;**72**:1180. doi:10.1038/S41430-018-0195-X
- 11 Jakobsen J, Ovesen L, Fagt S, *et al.* Para-aminobenzoic acid used as a marker for completeness of 24 hour urine: assessment of control limits for a specific HPLC method. *Eur J Clin Nutr* 1997;**51**:514–9. doi:10.1038/SJ.EJCN.1600434
- 12 Munch IC, Kessel L, Borch-Johnsen K, *et al.* Microvascular retinopathy in subjects without diabetes: the Inter99 Eye Study. *Acta Ophthalmol* 2012;**90**:613–9. doi:10.1111/j.1755-3768.2011.2148.x
- 13 Byberg S, Vistisen D, Diaz L, *et al.* Optos wide-field imaging versus conventional camera imaging in Danish patients with type 2 diabetes. *Acta Ophthalmol* 2019;**97**:815–20. doi:10.1111/aos.14118

**STROBE 2007 (v4) Statement—Checklist of items that should be included in reports of *cohort studies***

| Section/Topic                | Item # | Recommendation                                                                                                                                                                       | Reported on page # |
|------------------------------|--------|--------------------------------------------------------------------------------------------------------------------------------------------------------------------------------------|--------------------|
| <b>Title and abstract</b>    | 1      | (a) Indicate the study's design with a commonly used term in the title or the abstract                                                                                               | 1                  |
|                              |        | (b) Provide in the abstract an informative and balanced summary of what was done and what was found                                                                                  | 2                  |
| <b>Introduction</b>          |        |                                                                                                                                                                                      |                    |
| Background/rationale         | 2      | Explain the scientific background and rationale for the investigation being reported                                                                                                 | 5-6                |
| Objectives                   | 3      | State specific objectives, including any prespecified hypotheses                                                                                                                     | 5-6                |
| <b>Methods</b>               |        |                                                                                                                                                                                      |                    |
| Study design                 | 4      | Present key elements of study design early in the paper                                                                                                                              | 5-7                |
| Setting                      | 5      | Describe the setting, locations, and relevant dates, including periods of recruitment, exposure, follow-up, and data collection                                                      | 6-7                |
| Participants                 | 6      | (a) Give the eligibility criteria, and the sources and methods of selection of participants. Describe methods of follow-up                                                           | 6-7                |
|                              |        | (b) For matched studies, give matching criteria and number of exposed and unexposed                                                                                                  | -                  |
| Variables                    | 7      | Clearly define all outcomes, exposures, predictors, potential confounders, and effect modifiers. Give diagnostic criteria, if applicable                                             | 7-9                |
| Data sources/<br>measurement | 8*     | For each variable of interest, give sources of data and details of methods of assessment (measurement). Describe comparability of assessment methods if there is more than one group | 7-9                |
| Bias                         | 9      | Describe any efforts to address potential sources of bias                                                                                                                            | 5                  |
| Study size                   | 10     | Explain how the study size was arrived at                                                                                                                                            | 7                  |
| Quantitative variables       | 11     | Explain how quantitative variables were handled in the analyses. If applicable, describe which groupings were chosen and why                                                         | 10-11              |
| Statistical methods          | 12     | (a) Describe all statistical methods, including those used to control for confounding                                                                                                | 10-11              |
|                              |        | (b) Describe any methods used to examine subgroups and interactions                                                                                                                  | 10-11              |
|                              |        | (c) Explain how missing data were addressed                                                                                                                                          | 10                 |
|                              |        | (d) If applicable, explain how loss to follow-up was addressed                                                                                                                       | 10                 |
|                              |        | (e) Describe any sensitivity analyses                                                                                                                                                | -                  |
| <b>Results</b>               |        |                                                                                                                                                                                      |                    |

|                          |     |                                                                                                                                                                                                              |     |
|--------------------------|-----|--------------------------------------------------------------------------------------------------------------------------------------------------------------------------------------------------------------|-----|
| Participants             | 13* | (a) Report numbers of individuals at each stage of study—eg numbers potentially eligible, examined for eligibility, confirmed eligible, included in the study, completing follow-up, and analysed            | 6-7 |
|                          |     | (b) Give reasons for non-participation at each stage                                                                                                                                                         | n/a |
|                          |     | (c) Consider use of a flow diagram                                                                                                                                                                           | n/a |
| Descriptive data         | 14* | (a) Give characteristics of study participants (eg demographic, clinical, social) and information on exposures and potential confounders                                                                     | -   |
|                          |     | (b) Indicate number of participants with missing data for each variable of interest                                                                                                                          | -   |
|                          |     | (c) Summarise follow-up time (eg, average and total amount)                                                                                                                                                  | 7   |
| Outcome data             | 15* | Report numbers of outcome events or summary measures over time                                                                                                                                               | -   |
| Main results             | 16  | (a) Give unadjusted estimates and, if applicable, confounder-adjusted estimates and their precision (eg, 95% confidence interval). Make clear which confounders were adjusted for and why they were included | -   |
|                          |     | (b) Report category boundaries when continuous variables were categorized                                                                                                                                    | -   |
|                          |     | (c) If relevant, consider translating estimates of relative risk into absolute risk for a meaningful time period                                                                                             | -   |
| Other analyses           | 17  | Report other analyses done—eg analyses of subgroups and interactions, and sensitivity analyses                                                                                                               | -   |
| <b>Discussion</b>        |     |                                                                                                                                                                                                              |     |
| Key results              | 18  | Summarise key results with reference to study objectives                                                                                                                                                     | -   |
| <b>Limitations</b>       |     |                                                                                                                                                                                                              |     |
| Interpretation           | 20  | Give a cautious overall interpretation of results considering objectives, limitations, multiplicity of analyses, results from similar studies, and other relevant evidence                                   | -   |
| Generalisability         | 21  | Discuss the generalisability (external validity) of the study results                                                                                                                                        | -   |
| <b>Other information</b> |     |                                                                                                                                                                                                              |     |
| Funding                  | 22  | Give the source of funding and the role of the funders for the present study and, if applicable, for the original study on which the present article is based                                                | 14  |

\*Give information separately for cases and controls in case-control studies and, if applicable, for exposed and unexposed groups in cohort and cross-sectional studies.

**Note:** An Explanation and Elaboration article discusses each checklist item and gives methodological background and published examples of transparent reporting. The STROBE checklist is best used in conjunction with this article (freely available on the Web sites of PLoS Medicine at <http://www.plosmedicine.org/>, Annals of Internal Medicine at <http://www.annals.org/>, and Epidemiology at <http://www.epidem.com/>). Information on the STROBE Initiative is available at [www.strobe-statement.org](http://www.strobe-statement.org).
